22 **Abstract (196/200 words)**

23 Resting-state functional connectivity (FC) has become a major fMRI method to study  
24 network organization of human brains. There is recent interest in the temporal  
25 fluctuations of FC calculated using short time-windows (“dynamic FC”) because it  
26 could provide information inaccessible with conventional “static” FC that is typically  
27 calculated using the entire scan lasting several tens of minutes. Although multiple  
28 studies have revealed considerable temporal fluctuations in FC, it is still unclear  
29 whether the fluctuations of FC measured in hemodynamics reflect the dynamics of  
30 underlying neural activity. We addressed this question using simultaneous imaging of  
31 neuronal calcium and hemodynamic signals in mice, and found coordinated temporal  
32 dynamics of calcium FC and hemodynamic FC measured in the same short time  
33 windows. Moreover, we found that variation in transient neuronal coactivation patterns  
34 (CAPs) was significantly related to temporal fluctuations of sliding window FC in  
35 hemodynamics. Finally, we show that observed dynamics of FC cannot be fully  
36 accounted for by simulated data assuming stationary FC. These results provide evidence  
37 for the neuronal origin of dynamic FC and further suggest that information relevant to  
38 FC is condensed in temporally sparse events that can be extracted using a small number  
39 of time points.

40

41

42 **Keywords:** calcium imaging, BOLD, resting state, functional connectivity, stationarity

43

## 44 **Introduction**

45 Resting state functional connectivity (FC) uses temporal correlation of spontaneous  
46 neuronal activity to assess network organization of brain regions in a non-invasive  
47 manner (Fox and Raichle 2007). Traditionally, FC has been calculated using all time  
48 points in a scan that typically lasts between several minutes to tens of minutes (Biswal  
49 et al. 1995; Fox et al. 2005; Van Dijk et al. 2010). Such “static” FC has been shown to  
50 largely reflect anatomical connectivity (Adachi et al. 2012; Honey et al. 2009; Matsui et  
51 al. 2012; Matsui et al. 2011; Vincent et al. 2007). Recently, in contrast to traditional  
52 analysis of “static” FC, the temporal fluctuation of FC across short time windows is  
53 increasingly recognized as a useful aspect of FC (Allen et al. 2014; Hutchison et al.  
54 2013; Zalesky et al. 2014). Such “dynamic” FC (dFC) calculated using short  
55 time-windows could provide information that is inaccessible with static FC about the  
56 functional network organizations of healthy and diseased brains (Calhoun et al. 2014;  
57 Preti et al. 2016) [We note that the term “dynamics” refers to the non-stationarity of FC  
58 obtained with the sliding window analyses and does not refer to a process that is not  
59 invariant against to temporal reordering of the samples (Liégeois et al. 2017)]. The  
60 presence of temporal fluctuations in FC has also informed theoreticians to constrain  
61 realistic models of brain networks (Deco et al. 2013; Hansen et al. 2015; Messé et al.  
62 2014).

63 However, despite growing interest, the neurophysiological basis of dFC is still  
64 weak. Previous attempts to investigate neural origin of dFC by simultaneous  
65 measurement of electrophysiological and functional magnetic resonance imaging  
66 (fMRI) are limited in several ways (Lu et al. 2007; Pan et al. 2011; Tagliazucchi et al.  
67 2012b; Thompson et al. 2013). In some studies, electrophysiological recording was  
68 limited to a small number of recording sites due to technical difficulty (Lu et al. 2007;  
69 Pan et al. 2011; Thompson et al. 2013); hence, information on the global pattern of  
70 neuronal activity was lacking. In another study, electrophysiological signals were  
71 obtained with an electroencephalogram, which records global neuronal activity but  
72 lacks precise spatial information (Tagliazucchi et al. 2012b). Thus, the link between  
73 temporal fluctuations of FC in hemodynamics and that of large-scale neuronal activity  
74 has not been adequately proven.

75 Several studies have also questioned whether the apparent “dynamics” of FC  
76 calculated using the sliding window method is related to temporal instability of

77 spontaneous brain network (Hindriks et al. 2016; Laumann et al. 2016). While many  
78 studies have attributed temporal fluctuations of sliding window FC to non-stationarity  
79 of spontaneous neuronal activity correlation (Allen et al. 2014; Zalesky et al. 2014),  
80 some recent studies have demonstrated that the temporal fluctuations of FC observed in  
81 the real and the simulated data, which is stationary by construction, are statistically  
82 indistinguishable (Hindriks et al. 2016; Laumann et al. 2016). Furthermore, Laumann  
83 and colleagues have shown that, in the human resting-state BOLD time series are  
84 largely stationary, discounting head-motion and fluctuating arousal (Laumann et al.  
85 2016). Therefore, not only the neuronal basis of dFC, but also the existence of statistical  
86 non-stationarity of FC, or at least the capability of sliding window methods to detect the  
87 non-stationarity, is called into question.

88 In the present study, we addressed these questions using simultaneous imaging of  
89 neuronal calcium and blood oxygen level dependent (BOLD) hemodynamic signals in  
90 the entire neocortex of transgenic mice expressing a genetically encoded calcium  
91 indicator (Matsui et al. 2016; Vanni and Murphy 2014; White et al. 2011). In the present  
92 experimental setup, wide-field calcium signal provided access to neuronal activity at  
93 higher temporal resolution and signal-to-noise ratio compared to that of hemodynamic  
94 signal (Matsui et al. 2016; Murakami et al. 2017; Murakami et al. 2015; Tohmi et al.  
95 2014; Vanni and Murphy 2014). Moreover, unlike human fMRI data, in the present  
96 dataset, mice were tightly head-fixed and lightly anesthetized; thus, excluding head  
97 motions from contaminating FC. Main findings of the present study are as follows. First,  
98 we found consistency between the “dynamics” of FC calculated using calcium and  
99 hemodynamic signals, suggesting the neuronal origin of the temporal fluctuations of  
100 hemodynamic FC. Second, we found that temporal fluctuations of the spatial pattern of  
101 transient neuronal coactivations as measured in calcium signal were significantly  
102 correlated with temporal fluctuations of hemodynamic FC. Finally, we found that  
103 statistical properties of sliding window FC were significantly different between the real  
104 and the simulated data suggesting non-stationarity of resting-state FC.

## 105 **Materials and Methods**

### 106 *Animals*

107 Emx1-IRES-cre and Ai38 (Zariwala et al. 2012) mice were obtained from the Jackson  
108 Laboratory (Sacramento, CA). These mice were crossed and all cortical excitatory  
109 neurons expressed GCaMP3. Mice (P60–P90) were prepared for *in vivo* wide-field  
110 simultaneous imaging. Anesthesia was induced with isoflurane (3 %) and maintained  
111 with isoflurane (1 – 2 % in surgery, 0.5 – 0.8 % during imaging) and chlorprothixene  
112 (0.3 – 0.8 mg/kg, intramuscular injection). For simultaneous imaging of calcium and  
113 hemodynamic signals, a custom-made metal head plate was attached to the skull using  
114 dental cement (Sun Medical Company, Ltd, Shiga, Japan) and a large craniotomy was  
115 made over the whole cortex. The craniotomy was sealed with 1 % agarose and a glass  
116 coverslip. During the imaging, body temperature was maintained by a heat pad. All  
117 experiments were carried out in accordance with the NIH Guide for the Care and Use of  
118 Laboratory Animals, the institutional animal welfare guidelines set forth by the Animal  
119 Care and Use Committee of Kyushu University, and the study was approved by the  
120 Ethical Committee of Kyushu University.

121

### 122 *Simultaneous Calcium and Intrinsic Signal Imaging*

123 The data for simultaneous imaging of calcium and hemodynamic signals was taken  
124 from a published report (Matsui et al. 2016). Briefly, simultaneous imaging of calcium  
125 and intrinsic signals *in vivo* was performed using a macro zoom fluorescence  
126 microscope (MVX-10, Olympus, Tokyo, Japan) or an upright fluorescence microscope  
127 (ECLIPSE Ni-U, Nikon, Tokyo, Japan), equipped with a 1x objective. A 625 nm LED  
128 light source was used to obtain intrinsic signals, which we referred to as the  
129 hemodynamic signal (Vanni and Murphy 2014). At this wavelength, the optical intrinsic  
130 signal primarily reflects deoxyhemoglobin signal (HbR) (Ma et al. 2016). GCaMP was  
131 excited by a 100 W mercury lamp through a GFP mirror unit (Olympus). Intrinsic signal  
132 data was collected at a frame rate of 5 Hz using a CCD camera (1,000m; Adimec,  
133 Boston, MA, U.S.A.) and calcium signal data was collected at a frame rate of 10 Hz  
134 using a CCD camera (DS-Qi1 Mc; Nikon). The emission filters were 625 nm long pass  
135 (SC-60, Fuji film, Tokyo, Japan) for intrinsic signals, and 505-535 nm band pass  
136 (FF01-520/35-25, Semrock, Lake Forest, Illinois) for calcium signals. Data were  
137 acquired for 30-60 min per animal (5 min per scan).

138

### 139 ***Data Preprocessing***

140 All data analyses were conducted in Matlab (MathWorks, Natick, MA) using a method  
141 described previously (Matsui et al. 2016). Briefly, all the image frames were corrected  
142 for possible within-scan motion by rigid-body transformation. Calcium and  
143 hemodynamic images were then coregistered by rigid-body transformation using  
144 manually selected anatomical landmarks that were visible in both images (e.g.,  
145 branching points of blood vessels). All of the images were then spatially down-sampled  
146 by a factor of two. Pixels within the cortex (at this point including large blood vessels  
147 including the sinus) were extracted manually. For both calcium and hemodynamics,  
148 slow drift in each pixel's time course was removed using a high-pass filter ( $> 0.01$  Hz,  
149 second order Butterworth. No low-pass filter was used). After filtering, each pixel's  
150 time course was normalized by subtracting the mean across time and then dividing by  
151 the standard deviation across time. Global signal regression was conducted by  
152 regressing out the time course of average signal within the brain from each pixel's time  
153 course. Finally, hemodynamic signal was multiplied by -1 to set the polarity of the  
154 activity change equal to that in the calcium signal.

155 In some analyses, the calcium signal was further preprocessed. To obtain the high  
156 frequency calcium signal, an additional high-pass filter ( $> 0.1$  Hz) followed by a median  
157 filter was applied. The median filter was applied as follows: For each frame, we defined  
158 a time-window (width = 200 frames) whose center was positioned at the frame. Then,  
159 the signal of the frame was replaced by the median of the time-window [ $B(t) =$   
160  $\text{median}(A(t-100), \dots, A(t+100))$ ]; where  $A(k)$  denotes the original signal at frame  $k$  and  
161  $B(k)$  denotes median filtered signal at frame  $k$ ]. To obtain the low frequency calcium  
162 signal, an additional low-pass filter ( $< 0.1$  Hz) was applied.

163

### 164 ***Extraction of Region-of-Interest (ROI) Time Courses***

165 Selection of ROI and time courses are conducted as described previously (Matsui et al.  
166 2016). Briefly, 38 cortical regions (19 for each hemisphere) were selected as ROIs  
167 based on a previous mouse functional connectivity study (White et al. 2011)  
168 (Supplementary Fig. 1). Each ROI was a  $6 \times 6$  pixel square ( $0.5 \text{ mm} \times 0.5 \text{ mm}$ )  
169 centered at a selected coordinate. The time course for each ROI was calculated by  
170 averaging the time courses of pixels within the ROI that corresponded to gray matter.

171 ROIs located outside of the FOV were discarded.

172

### 173 *Analysis of FC*

174 For both calcium and hemodynamic signals, FC was calculated using a standard  
175 seed-based correlation method (Matsui et al. 2016). First, the correlation coefficient  
176 between the time course of a selected ROI ("seed time course") and the time course of  
177 every pixel within the brain was calculated. Second, FC values were averaged across  
178 scans to obtain FC values for each pixel. The spatial correlation between FC maps of  
179 calcium and hemodynamic signals was calculated by taking the pixel-by-pixel  
180 correlation coefficient between the two maps using all the gray matter pixels. FC with  
181 short time window was obtained by taking correlation coefficient using all the frames  
182 within a 30-sec window. Steps of 3 sec and 30 sec were used for the sliding window and  
183 non-overlapping window, respectively. Scan-shifted control was calculated by shifting  
184 the scan number of hemodynamics data relative to simultaneously obtained calcium  
185 data.

186

### 187 *Analysis of Co-Activation Patterns (CAPs)*

188 CAP analysis was adopted from previous fMRI studies (Liu and Duyn 2013). Briefly,  
189 calcium time course from each ROI was z-normalized. CAPs were calculated for each  
190 ROIs. Frames corresponding to large peaks ( $> 2$  s.d.) of the time course of a given ROI  
191 were considered CAPs. We examined if CAPs calculated using calcium signal could  
192 predict sliding-window FC calculated using hemodynamic signal. For each ROI and  
193 each time window, we quantified the similarity between the sliding window FC and  
194 CAPs by calculating spatial correlation between the FC map and CAPs. To quantify  
195 coordinated temporal variations in CAPs and FCs, we also calculated temporal  
196 deviation of CAP and FC from the mean patterns as described in the followings. First,  
197 we calculated average patterns of CAPs and FCs in a given scan. For a given scan and a  
198 ROI<sub>*i*</sub>, average of all CAPs was calculated using the entire scan( $CAP_{scan}$ )<sub>*i*</sub>. Similarly, a  
199 FC map was calculated for the same scan and the same ROI [ $(FC_{scan})_i$ ]. We repeated this  
200 procedure to obtain ROI-by-ROI matrices of  $CAP_{scan}$  and  $FC_{scan}$ . Next, we calculated  
201 ROI-by-ROI matrices of CAPs and FCs in a short time window ( $CAP_{window}$  and  
202  $FC_{window}$ ) using the same procedure used to calculate  $CAP_{scan}$  and  $FC_{scan}$  but for each 30  
203 sec time window. Then difference between the  $CAP_{window}$  and  $CAP_{scan}$  was taken to

204 quantify the deviation of CAP in a time window from the mean CAP pattern in the  
205 entire scan [ $\Delta\text{CAP} = \text{CAP}_{\text{window}} - \text{CAP}_{\text{scan}}$ ]. Similarly,  $\Delta\text{FC}$  was obtained by subtracting  
206  $\text{FC}_{\text{scan}}$  from  $\text{FC}_{\text{window}}$ . Finally, correlation coefficient between non-diagonal elements of  
207 the ROI-by-ROI matrices of  $\Delta\text{CAP}$  and  $\Delta\text{FC}$  were calculated. When CAPs were absent  
208 for a particular ROI in a time window, that ROI was omitted from the calculation for the  
209 time window.

210

### 211 *Cluster Analysis and Kurtosis Analysis*

212 For the state analysis of sliding window FC, we adopted the k-means clustering  
213 algorithm used in the previous studies (Allen et al. 2014; Laumann et al. 2016).  
214 Correlation distance (1-r) was used to compute the separation between each window's  
215 FC-matrix (using all 38 ROIs) and the k-means clustering was iterated 100 times with  
216 random centroid positions to avoid local minima. The windowed FC-matrices were  
217 mean-centered by scan to eliminate scan-level and subject-level features from  
218 contributing the clustering result. K-means clustering was applied in the same manner to  
219 the simulated data that was matched in size to the real data. The cluster validity index  
220 was used to evaluate the quality of clustering for the range of cluster numbers ( $k = 2-10$ ).  
221 The cluster validity index was computed as the average ratio of within-cluster distance  
222 to between-cluster distance.

223 Non-stationarity of spontaneous neuronal signal correlation was assessed by  
224 calculating multivariate kurtosis using the same procedure as described by Laumann  
225 and colleagues (Laumann et al. 2016). One value of kurtosis was calculated for each  
226 FC-matrix (using all 38 ROIs) obtained each scan. The same procedure was applied to  
227 the simulated data that was matched in size to the real data. Significant difference  
228 between the kurtosis measure of the real and the simulated data indicates either  
229 non-stationarity of FC or non-gaussianity of the signal or both.

230

### 231 *Time Course Simulation*

232 To obtain a null dataset to evaluate the non-stationarity of the real data, we constructed  
233 simulated time courses using a method developed by Laumann and colleagues  
234 (Laumann et al. 2016). Briefly, random normal deviates having the same dimensionality  
235 as a real dataset are sampled. These time courses are multiplied in the spectral domain  
236 by the average power spectrum of the (bandpass filtered) real data. These time courses



237 are then projected onto the eigenvectors derived from the covariance matrix of the real  
238 data. This procedure produces simulated data that are stationary by construction but  
239 matched to real data in the covariance structure and mean spectral content.

240

#### 241 *Assessment of motion-related and physiological artifacts*

242 To estimate the strength of motion-related and physiological artifacts from functional  
243 images, we calculated DVARS using the hemodynamic signal with a procedure  
244 described in fMRI literatures (Power et al. 2012; Power et al. 2014). Specifically, for  
245 each scan, after the preprocessing, root mean squares of the temporal derivatives of the  
246 hemodynamic time courses were calculated and averaged across ROIs to obtain one  
247 time course of DVARS. To remove the data potentially contaminated by the artifact, we  
248 conducted two types of analyses. First, for each scan, the histogram of DVARS was  
249 calculated to exclude scans with strong skewness (Supplementary Fig. 3)  
250 (scan-censoring). To define the DVARS histogram with strong skewness, we calculated  
251 DVARS histograms for 1000 sets of simulation described in the preceding section. If the  
252 skewness of the data was larger than the 99<sup>th</sup> percentiles of the simulation, the scan was  
253 considered to be strongly skewed. Second, frame-censoring was conducted at multiple  
254 DVARS thresholds as described in the fMRI literatures (Power et al. 2012; Power et al.  
255 2014). For a given threshold, frames with DVARS larger than the threshold were simply  
256 discarded from the subsequent analyses.

257

#### 258 *Assessment of the normality of the signal*

259 To check for the normality of the hemodynamic and the calcium signals, we computed  
260 the 4<sup>th</sup> moment of the signal distribution for each scan. For each scan, signals in all the  
261 ROIs were concatenated before calculating the 4<sup>th</sup> moment. Similar results were  
262 obtained when the 4<sup>th</sup> moment was calculated separately for individual ROIs and then  
263 the mean of the 4<sup>th</sup> moment was obtained for each scan (data not shown). The calculated  
264 4<sup>th</sup> moment of the real data was then compared with that of the 1000 simulated time  
265 courses obtained by the procedure described above. If the 4<sup>th</sup> moment of the real data  
266 was larger than the 99<sup>th</sup> percentile of the simulation, the signal in the scan was  
267 considered to be non-normal. In the case of calcium signal, we applied median filter to  
268 remove high frequency noise and enforce normality of the signal. Calcium time courses  
269 often contained some high frequency noise on top of the slower calcium activity (Fig.

270 1A), which was most likely due to the moderate level of excitation light adjusted to  
271 avoid bleaching of GCaMP fluorophore. We consider that the median filter removed  
272 these high frequency noise while retaining slower calcium signal that was  
273 approximately normally distributed.

## 274 **Results**

### 275 *Consistent FC dynamics in calcium and hemodynamic signals*

276 Transgenic mice expressing GCaMP in neocortical neurons were used to simultaneously  
277 measure neuronal calcium signal and hemodynamics in a large portion of bilateral  
278 neocortex (Fig. 1A) (Matsui et al. 2016). Mice were lightly anesthetized and head-fixed  
279 with metal plates so that head-motion could not contaminate the signals. For both  
280 calcium and hemodynamic signals, power spectra of the signals exhibited  
281 approximately linear trend on log-log plots (Supplementary Fig. 2) suggesting that the  
282 non-neuronal artifact was small. We used sliding window correlation (30 sec window at  
283 3 sec steps) to examine if calcium and hemodynamic FC in mice exhibited “dynamic”  
284 changes. Consistent with previous reports in humans (Allen et al. 2014; Chang and  
285 Glover 2010; Zalesky et al. 2014) and other animals (Hutchison et al. 2014; Majeed et  
286 al. 2009), FC between pairs of ROIs calculated with sliding windows showed  
287 considerable variability over different time points both in calcium signal and  
288 hemodynamics (Fig. 1B-C). Consistent with the idea that variability in hemodynamic  
289 FC arises from underlying neuronal activity, we found close matches between dFC of  
290 calcium and hemodynamics (correlation coefficients, 0.631 and 0.675 for Figs. 1B and  
291 1C, respectively). Correlation between the time courses of calcium FC and  
292 hemodynamic FC was significantly larger for the data than that of the scan-shifted  
293 control ( $P < 10^{-20}$ , Kolmogorov-Smirnov test; Fig. 1D).

294 To further examine the consistency between dFC in calcium and hemodynamics in  
295 the entire neocortex, we calculated calcium and hemodynamic FC among all pairs of  
296 ROIs and compared them across time windows (Fig. 2A-B). The ROI-based  
297 FC-matrices in calcium and hemodynamics both showed variability across time  
298 windows. On the other hand, FC matrices in calcium and hemodynamics within each  
299 time window were similar. If dFC in calcium and hemodynamics were matched, the  
300 similarity between calcium and hemodynamic FC in the same time window should be  
301 higher than that calculated using different time windows (e.g., similarity between  
302  $\text{Ca-FC}_{\text{window\#1}}$  and  $\text{Hemo-FC}_{\text{window\#1}}$  would be higher than the similarity between  
303  $\text{Ca-FC}_{\text{window\#1}}$  and  $\text{Hemo-FC}_{\text{window\#2}}$ ). Otherwise, the similarity between FC-matrices in  
304 calcium and hemodynamics merely reflects the overall similarity of FC in calcium and  
305 hemodynamics but not the coordinated “dynamics” of calcium and hemodynamic FC.  
306 Across all the data, we found that the distribution of the correlation coefficient between

307 the FC-matrices in calcium and hemodynamics was shifted toward positive values  
308 compared with that calculated with the scan-shifted data ( $P < 10^{-14}$ ,  
309 Kolmogorov-Smirnov test; Fig. 2C). The difference between the real data and the  
310 trial-shifted data was also consistently positive across animals ( $p < 0.0156$ ,  $n = 7$  mice,  
311 sign-rank test; Fig. 2D) and was seen across various window sizes ranging from 1 sec to  
312 60 sec (Fig. 2E). Together these results suggest that temporal variability in  
313 hemodynamic FC, as measured with sliding window, arises from neural activity rather  
314 than from movement-related artifacts (Laumann et al. 2016) or non-neuronal  
315 physiological artifacts such as heartbeat and respiration (Bianciardi et al. 2009; Shmueli  
316 et al. 2007).

317

### 318 *Variations in transient neuronal coactivations explained variations in FC*

319 What are the potential neuronal events that create dFC? Recent fMRI studies proposed  
320 that variability in the neuronal coactivation pattern (CAP) of brain areas is directly  
321 reflected in the “dynamic” change of FC observed with the sliding window correlation  
322 (Liu and Duyn 2013). To address this possibility, for each scan, we compared sliding  
323 window FC calculated using hemodynamics with the CAPs calculated using calcium  
324 signal. The use of calcium signal for extracting CAPs allowed us to capture faster  
325 spatiotemporal dynamics than the hemodynamics. More importantly, the use of two  
326 different signals also allowed us to avoid comparing sliding window FC and CAPs that  
327 were derived from the same signals and could lead to circular logic.

328 For each anatomical ROI, we first detected peaks in the calcium signal within a  
329 given time-window and then defined CAPs as the frames in the calcium signal  
330 corresponding to the detected peak locations (Fig. 3A) (Liu and Duyn 2013). Similar to  
331 the previous reports in fMRI (Liu et al. 2013; Liu and Duyn 2013), we found variations  
332 in the spatial patterns of CAPs extracted from the same ROI (Fig. 3A, panels above time  
333 courses). We used CAPs to examine if variations of the spatial pattern of CAPs in  
334 different time windows could explain the spatial variation of sliding window FC. For  
335 each ROI in each 30 sec window, we extracted CAPs and FC using calcium and  
336 hemodynamic signals, respectively. In the example 30 sec windows shown in Figure 3A,  
337 time courses of the chosen ROI showed transient activations that resulted in 11 and 3  
338 frames of CAPs (corresponding to 1.1 and 0.3 sec of data, respectively). Despite the  
339 small number of frames corresponding to CAPs, the average spatial pattern of CAPs in

340 the time window closely matched the spatial pattern of hemodynamic FC calculated in  
341 the same time window (compare mean CAP and mean FC in Fig. 3A).

342 To further compare CAPs with sliding window hemodynamic FC across ROIs, we  
343 calculated CAPs for all pairs of ROIs and compared them with FC of the same  
344 ROI-pairs in the same time window (Fig. 3B). Across all the data, CAP-matrices and  
345 FC matrices showed high positive correlation (Fig. 3C-D; mean  $R = 0.525$  across  
346 animals) suggesting that CAP and FC calculated using the same sliding window were  
347 similar.

348 The similarity between calcium CAP and hemodynamic FC in short time window  
349 does not necessarily indicate coordinated temporal variation between CAP and FC, but  
350 could result entirely from similarity between the time-average patterns of CAP and FC.  
351 Therefore, to further examine if coordinated temporal variations in CAPs and FCs exist,  
352 we calculated  $\Delta$ CAP and  $\Delta$ FC by subtracting from each CAP and FC in each time  
353 window the average pattern of CAP and FC, respectively, that were calculated using the  
354 entire scan (Fig. 4A). Coordinated change in  $\Delta$ CAP and  $\Delta$ FC indicates similar temporal  
355 fluctuation of CAP and sliding-window FC that cannot be accounted for by the  
356 similarity in the mean pattern of CAP and FC calculated using the entire scan. We found  
357 that the distribution of the correlation between  $\Delta$ CAP and  $\Delta$ FC for the real data was  
358 shifted toward positive values whereas the same distribution calculated using  
359 trial-shifted data was centered near zero ( $P < 10^{-30}$ , Kolmogorov-Smirnov test; Fig. 4B).  
360 Furthermore, the correlation between  $\Delta$ CAP and  $\Delta$ FC was consistently positive across  
361 all animals ( $P < 0.156$ ,  $n = 7$  mice, sign rank test; Fig. 4C) and was seen across various  
362 sizes of time-windows ranging from 1 to 60 sec (Fig. 4D). Excluding scans with  
363 potential artifacts using DVARS (Power et al. 2012; Power et al. 2014) still yielded a  
364 significant difference between the real and the trial-shifted data (Supplementary Fig. 9).  
365 Taken together, these results suggest temporal fluctuations of the spatial pattern of  
366 CAPs at least partly explain temporal fluctuations of hemodynamic FC calculated using  
367 sliding windows.

368

### 369 ***“Dynamics” of FC arise from non-stationarity of resting-state activity***

370 Because FC is estimated by using finite number of time-points, temporal fluctuations of  
371 FC observed in short time-windows could arise from mere sampling error even when  
372 underlying FC is stationary (Laumann et al. 2016). We next addressed whether the

373 sampling error could explain the dFC observed in the present data. We compared two  
374 indices used in a previous study, namely cluster validity index and kurtosis, for real data  
375 and simulated data that are matched in spectral and covariance properties (Fig. 5A)  
376 (Laumann et al. 2016). The cluster validity index measures degree of clustering of  
377 multiple sliding window FC calculated within the scan. Note that smaller cluster  
378 validity index indicates more clustering (see Methods for details). For both calcium and  
379 hemodynamic signals, we found cluster validity index of real data to be significantly  
380 smaller than that of simulated data (Fig. 5B), suggesting that the real data had cluster  
381 structure that could not be fully accounted for by sampling error. Similarly, we  
382 calculated kurtosis of the covariance matrices of real and simulated data. If the kurtosis  
383 of real data were larger than that of simulated data assuming a stationary Gaussian  
384 process, non-stationarity is implied for the real data, if the real data is normally  
385 distributed (Laumann et al. 2016). For the hemodynamic signal, the real data was  
386 approximately normally distributed (Supplementary Fig. 8A). Thus, we calculated the  
387 kurtosis using the hemodynamic signal without further preprocessing. For the calcium  
388 signal, because the original signal was not normally distributed, we applied further  
389 preprocessing before calculating the kurtosis. First, we applied an additional high pass  
390 temporal filter to remove low frequencies ( $< 0.1$  Hz). Then we used a median filter to  
391 enforce a normality of the signal (Supplementary Fig. 6). For both hemodynamic and  
392 calcium signals, we found that the kurtosis of the real data was significantly higher than  
393 that of the simulated data ( $P < 10^{-10}$  for calcium, sign rank test,  $n = 50$  scans that showed  
394 approximately normal distribution of the signal (see Methods for the details of the  
395 assessment of normality);  $P < 10^{-11}$  for hemodynamics, sign rank test,  $n = 64$  scans; Fig.  
396 5C, Supplementary Fig. 8B). Calcium signal at low frequency ( $< 0.1$  Hz) was  
397 approximately normal without additional preprocessing (Supplementary Fig. 7A). The  
398 kurtosis of the real and the simulated data was also significantly different at this  
399 frequency range, though the magnitude of the difference was smaller (Supplementary  
400 Fig. 7B). Together, these results suggest that dFC arise from non-stationarity of  
401 spontaneous neuronal activity, and analyses based on sliding window correlation have  
402 the potential to detect non-stationarity.

403 To assess potential contribution of motion-related and physiological artifacts on the  
404 analysis of the non-stationarity using kurtosis, we used DVARS calculated using the  
405 hemodynamic signal to exclude time points for which the artifacts might have been

406 problematic (Power et al. 2012; Power et al. 2014). In some scans with large peaks in  
407 the time courses of DVARS, indicating potential body movements, the histogram of  
408 DVARS was strongly right-skewed (Supplementary Fig. 3). Analysis of the kurtosis  
409 using a subset of scans for which DVARS distribution was not right-skewed compared  
410 to the stationary simulation also revealed a significant difference between the real and  
411 the simulated data ( $P < 10^{-14}$ , sign rank test,  $n = 25$ ; Supplementary Fig. 4; see Materials  
412 and Methods for details). Furthermore, frame-censoring at several thresholds of DVARS  
413 revealed that the difference of kurtosis between the real and the simulated data did not  
414 depend on the levels of DVARS thresholds (Supplementary Fig. 5). These results  
415 suggest that the motion-related and physiological artifacts, as detected by DVARS, did  
416 not significantly affect the present results.

## 417 **Discussion**

418 In the present study, we used simultaneous imaging of calcium and hemodynamic  
419 signals to show that temporal fluctuations in hemodynamic FC calculated in a short  
420 time window closely follow that of calcium FC, suggesting the neuronal origin of dFC.  
421 We have further shown that the spatial pattern of hemodynamic FC in a short time  
422 window is predicted by averaging transient coactivations in the calcium signal (CAPs)  
423 contained within the same time-window suggesting that temporally interspersed  
424 transient neuronal events underlie resting-state FC. Finally, we have shown that in both  
425 calcium and hemodynamic signals, statistical properties of FC calculated in a short time  
426 window was significantly different from that obtained with simulated signals that were  
427 stationary by construction. These results advocate for the analysis of the “dynamic”  
428 aspect of FC obtained in human fMRI experiments. Insights of the neuronal events  
429 underlying dFC provided by the present study would also be informative for developing  
430 appropriate analysis methods for dFC.

431

### 432 ***Relationship to previous investigations of the neuronal origin of dFC***

433 To provide direct evidence linking neuronal activity and dFC, several groups have  
434 conducted simultaneous recording of fMRI and local field potential (LFP) (Lu et al.  
435 2007; Pan et al. 2011; Thompson et al. 2013) or EEG (Chang et al. 2013; Tagliazucchi  
436 et al. 2012b). However, these previous studies were limited in several ways. Since LFP  
437 recordings were limited from a small number of recording sites whereas EEG recording  
438 did not have enough spatial resolution, evidence directly linking global spatial pattern of  
439 neuronal activity with hemodynamic FC has been lacking. Using simultaneous imaging  
440 of calcium and hemodynamic signals, the present study provides evidence suggesting  
441 that temporal variability of hemodynamic FC and its time-to-time spatial patterns reflect  
442 spatial patterns of large-scale neuronal activity. Moreover, since the present study used  
443 anesthetized and head-fixed mice, the results are unlikely to be attributable to head  
444 motion.

445 Recent human fMRI studies have proposed that neuronal activity important for FC  
446 is condensed into transient large scale neuronal coactivations (i.e. CAPs) (Liu and Duyn  
447 2013; Tagliazucchi et al. 2012a; Tagliazucchi et al. 2011). Consistent with this idea,  
448 imaging studies in mice revealed transient neuronal coactivations across brain areas  
449 (Matsui et al. 2016; Mohajerani et al. 2013; Vanni and Murphy 2014). In our previous



450 study, we searched for neuronal coactivations that resembled the spatial patterns of  
451 (static) FC and showed that such neuronal coactivations were converted into spatially  
452 similar hemodynamic signals (Matsui et al. 2016). In the present study, we took a  
453 different approach that was similar to single frame analysis methods employed in recent  
454 human fMRI studies (Karahanoğlu and Van De Ville 2015; Liu et al. 2013; Liu and  
455 Duyn 2013; Tagliazucchi et al. 2011). We were especially interested whether CAPs  
456 represent the potential neuronal events underlying the temporal variability of sliding  
457 window FC. Because derivation of CAPs and sliding-window FC using identical BOLD  
458 signals could potentially lead to circular logic, in the present study, we examined the  
459 link between CAPs and sliding-window FC derived from different signals (calcium and  
460 hemodynamics, respectively). Instead of specifically looking at neuronal coactivations  
461 that resembled “static” FC, we took all the individual CAPs into our analysis and  
462 showed that variation of the spatial pattern of individual CAPs across time windows  
463 was significantly related to variations of hemodynamic FC across time windows. Thus,  
464 the present findings suggest importance of the development of analysis that specifically  
465 focuses on CAPs (Karahanoğlu and Van De Ville 2015; Liu et al. 2013). However, the  
466 modest correlation found between CAP and sliding window FC implies that the  
467 fluctuations of calcium and hemodynamic signals from the average pattern maybe small.  
468 It should also be noted that, although statistically significant, the correlation between  
469  $\Delta$ CAP and  $\Delta$ FC was relatively weak. Part of the reason for this could be non-neuronal  
470 physiological noise that contributed to hemodynamics (Matsui et al. 2016). In the  
471 present study, because of the use of anesthesia and head-fixation, head motion is  
472 unlikely to be the primary source of the non-neuronal noise. However, other  
473 physiological activities, e.g. respiration and heartbeat, are known to affect  
474 hemodynamics (Chang et al. 2009; Chang and Glover 2009) and, thus, likely to affect  
475 temporal fluctuation of hemodynamic FC as well. Although scan-wise data exclusion  
476 using DVARS suggested that the motion-contamination was not the major cause of the  
477 observed temporal correlation between  $\Delta$ CAP and  $\Delta$ FC (Supplementary Fig. 9), the  
478 common artifacts on hemodynamic and calcium signals could have contributed to the  
479 observed temporal correlation. Our results (i.e. relatively low correlation between  
480  $\Delta$ CAP and  $\Delta$ FC) indicate that correction for such non-neuronal physiological noise  
481 (Glover et al. 2000) is likely to be essential for the analysis of dFC.  
482

483 ***Non-stationarity of spontaneous brain activity correlation***

484 It has been of a matter of debate to what extent temporal fluctuations of FC is  
485 attributed to the dynamics of underlying neuronal activity but not to non-neuronal  
486 sources of noise (e.g., head motion, sampling variability; reviewed in (Hutchison et al.  
487 2013)). Laumann and colleagues have reported that most of the temporal fluctuations of  
488 single subject FC is explained by head motion (Laumann et al. 2016). After controlling  
489 for the head motion, Laumann and colleagues have concluded that statistical properties  
490 of resting-state FC in human fMRI is indistinguishable from those obtained with  
491 simulated signals that are stationary by construction. A similar study by Hindriks and  
492 colleagues has also indicated the apparent dFC calculated with the sliding window  
493 method does not necessarily indicate non-stationarity of resting brain network (Hindriks  
494 et al. 2016). However, in terms of spontaneous neuronal activity itself, there is  
495 substantial evidences showing that spontaneous neuronal activity is non-stationary  
496 (Foster and Wilson 2006; Ji and Wilson 2007; Logothetis et al. 2012). In particular,  
497 under both awake and anesthetized states, transient neuronal events such as  
498 sharp-wave-ripples have been shown to produce coordinated activity across the entire  
499 brain (Logothetis et al. 2012). The present results are consistent with these previous  
500 studies supporting the non-stationarity of neuronal activity, and further showed that FC  
501 calculated using such non-stationary neuronal activity also showed non-stationarity, as  
502 expected.

503

504 ***Potential contribution of arousal***

505 Fluctuation in the level of arousal has been shown to contribute to apparent “dynamics”  
506 and non-stationarity of FC (Laumann et al. 2016; Tagliazucchi and Laufs 2014). The  
507 present study observed larger temporal variability of hemodynamic FC in anesthetized  
508 mice than in awake, eyes open-fixated humans (Laumann et al. 2016). Interestingly, a  
509 recent study reports large within-subject FC variability in subjects instructed to close  
510 their eyes (Pannunzi et al. 2017), which predisposes to sleep (Tagliazucchi and Laufs  
511 2014). In the present study, it could be possible that fluctuating level of anesthesia,  
512 instead of the subject’s sleep state, could have contributed to the greater variability of  
513 FC. Alternatively, rapid fluctuation between awake and sleep states in mice (Adler et al.  
514 2014), could have contributed to the greater variability of FC compared to humans.  
515 According to the results of the analysis using power spectra (Supplementary Fig. 2) and

516 DVARS (Supplementary Figs. 3-5), we consider that the level of arousal rarely reached  
517 a point at which the animal started to struggle. Nevertheless, the present data alone was  
518 not sufficient to exclude the possibility that the fluctuation of the level of arousal  
519 accounted for a large fraction of the FC “dynamics” and non-stationarity observed here.  
520 Future experiments conducting simultaneous recordings of functional images and  
521 physiological signals (e.g. electroencephalogram, respiration-rates) in mice would be  
522 able to assess the exact amount of non-stationarity in FC under a defined state of  
523 arousal.

524

#### 525 *Other limitations of the study*

526 It should be clearly stated that the present results do not guarantee that sliding window  
527 methods are always capable of detecting non-stationarity in human resting-state fMRI  
528 data. The present study used tightly head-restrained animals and high signal to  
529 noise-ratio (SNR) imaging at a high frame rate (5 and 10 Hz for hemodynamics and  
530 calcium signal, respectively). Compared to the present experimental conditions, overall  
531 SNR in typical human resting-state fMRI is likely to be substantially compromised.  
532 Under such low SNR conditions, it is not clear whether simple sliding window  
533 correlation methods can detect the non-stationarity of FC (Hindriks et al. 2016;  
534 Laumann et al. 2016). With respect to SNR, we expect that the recent development of  
535 high-speed fMRI (Feinberg et al. 2010) will significantly improve the detectability of  
536 non-stationarity. Nevertheless, the present results suggest that, rather than the sliding  
537 window based method, an alternative analysis strategy that directly extracts CAPs from  
538 hemodynamic signals (Karahanoğlu and Van De Ville 2015; Liu et al. 2013; Liu and  
539 Duyn 2013; Tagliazucchi et al. 2012a) may be more appropriate for extracting relevant  
540 information related to dFC. Care should be taken, however, since the smaller brain and  
541 the low dimensionality of FC in the mouse (compared to the human) could also have  
542 made CAPs from just a few frames look similar to those of FC.

543 It should also be noted that the present results do not claim that dFC has significant  
544 behavioral or cognitive consequences. Instead of examining the potential relationship  
545 between dFC and cognitive dynamics or behavioral variability [see for recent review  
546 (Preti et al. 2016)], here we focused on validating the neuronal origin of dFC.  
547 Experiments under anesthesia greatly reduced potential confounding factors, such as  
548 head motion and arousal state (Hutchison et al. 2014; Laumann et al. 2016).

549 Nevertheless, the present wide-field imaging setup can be naturally extended to awake  
550 imaging with task-performing mice (Ferezou et al. 2007; Wechselblatt et al. 2016). Such  
551 experiments would reveal the potential consequences of the dFC on its behavioral  
552 outcome.

553 **Acknowledgements**

554 We thank A. Honda and Y. Sono for animal care and genotyping; the Research Support  
555 Center, Graduate School of Medical Sciences, Kyushu University, for technical support:  
556 and K. Jimura and Y. Noro for helpful discussion. Support for this work was provided  
557 by grants from Brain Mapping by Integrated Neurotechnologies for Disease Studies  
558 (Brain/MINDS) – Japan Agency for Medical Research and Development (AMED),  
559 Core Research for Evolutionary Science and Technology (CREST) – AMED and  
560 Strategic International Research Cooperative Program (SCIP) – AMED, and Japan  
561 Society for Promotions of Sciences (JSPS) KAKENHI Grants 25221001 and 25117004  
562 (to K.O.), World Premium Institute (WPI), JSPS (to K.O.); JSPS KAKENHI Grant  
563 17K14931 (to T. Matsui) and JSPS Research Fellowship 20153597 (to T. Murakami).

564 **References**

- 565 Adachi Y, Osada T, Sporns O, Watanabe T, Matsui T, Miyamoto K, Miyashita  
566 Y. 2012. Functional connectivity between anatomically unconnected  
567 areas is shaped by collective network-level effects in the macaque  
568 cortex. *Cereb Cortex*. 22(7):1586-1592.
- 569 Adler DA, Ammanuel S, Lei J, Dada T, Borbiev T, Johnston MV, Kadam SD,  
570 Burd I. 2014. Circadian cycle-dependent eeg biomarkers of  
571 pathogenicity in adult mice following prenatal exposure to in utero  
572 inflammation. *Neuroscience*. 275:305-313.
- 573 Allen EA, Damaraju E, Plis SM, Erhardt EB, Eichele T, Calhoun VD. 2014.  
574 Tracking whole-brain connectivity dynamics in the resting state.  
575 *Cereb Cortex*. 24(3):663-676.
- 576 Bianciardi M, Fukunaga M, van Gelderen P, Horovitz SG, de Zwart JA,  
577 Shmueli K, Duyn JH. 2009. Sources of functional magnetic resonance  
578 imaging signal fluctuations in the human brain at rest: A 7 t study.  
579 *Magn Reson Imaging*. 27(8):1019-1029.
- 580 Biswal B, Yetkin FZ, Haughton VM, Hyde JS. 1995. Functional connectivity  
581 in the motor cortex of resting human brain using echo-planar mri.  
582 *Magn Reson Med*. 34(4):537-541.
- 583 Calhoun VD, Miller R, Pearlson G, Adalı T. 2014. The chronnectome:  
584 Time-varying connectivity networks as the next frontier in fmri data  
585 discovery. *Neuron*. 84(2):262-274.
- 586 Chang C, Cunningham JP, Glover GH. 2009. Influence of heart rate on the  
587 bold signal: The cardiac response function. *Neuroimage*.  
588 44(3):857-869.
- 589 Chang C, Glover GH. 2009. Relationship between respiration, end-tidal co2,  
590 and bold signals in resting-state fmri. *Neuroimage*. 47(4):1381-1393.
- 591 Chang C, Glover GH. 2010. Time-frequency dynamics of resting-state brain  
592 connectivity measured with fmri. *Neuroimage*. 50(1):81-98.
- 593 Chang C, Liu Z, Chen MC, Liu X, Duyn JH. 2013. Eeg correlates of  
594 time-varying bold functional connectivity. *Neuroimage*. 72:227-236.
- 595 Deco G, Ponce-Alvarez A, Mantini D, Romani GL, Hagmann P, Corbetta M.  
596 2013. Resting-state functional connectivity emerges from structurally

- 597 and dynamically shaped slow linear fluctuations. *J Neurosci.*  
598 33(27):11239-11252.
- 599 Feinberg DA, Moeller S, Smith SM, Auerbach E, Ramanna S, Gunther M,  
600 Glasser MF, Miller KL, Ugurbil K, Yacoub E. 2010. Multiplexed echo  
601 planar imaging for sub-second whole brain fmri and fast diffusion  
602 imaging. *PLoS One.* 5(12):e15710.
- 603 Ferezou I, Haiss F, Gentet LJ, Aronoff R, Weber B, Petersen CC. 2007.  
604 Spatiotemporal dynamics of cortical sensorimotor integration in  
605 behaving mice. *Neuron.* 56(5):907-923.
- 606 Foster DJ, Wilson MA. 2006. Reverse replay of behavioural sequences in  
607 hippocampal place cells during the awake state. *Nature.*  
608 440(7084):680-683.
- 609 Fox MD, Raichle ME. 2007. Spontaneous fluctuations in brain activity  
610 observed with functional magnetic resonance imaging. *Nat Rev*  
611 *Neurosci.* 8(9):700-711.
- 612 Fox MD, Snyder AZ, Vincent JL, Corbetta M, Van Essen DC, Raichle ME.  
613 2005. The human brain is intrinsically organized into dynamic,  
614 anticorrelated functional networks. *Proc Natl Acad Sci U S A.*  
615 102(27):9673-9678.
- 616 Glover GH, Li TQ, Ress D. 2000. Image-based method for retrospective  
617 correction of physiological motion effects in fmri: Retroicor. *Magn*  
618 *Reson Med.* 44(1):162-167.
- 619 Hansen EC, Battaglia D, Spiegler A, Deco G, Jirsa VK. 2015. Functional  
620 connectivity dynamics: Modeling the switching behavior of the resting  
621 state. *Neuroimage.* 105:525-535.
- 622 Hindriks R, Adhikari MH, Murayama Y, Ganzetti M, Mantini D, Logothetis  
623 NK, Deco G. 2016. Can sliding-window correlations reveal dynamic  
624 functional connectivity in resting-state fmri? *Neuroimage.*  
625 127:242-256.
- 626 Honey CJ, Sporns O, Cammoun L, Gigandet X, Thiran JP, Meuli R,  
627 Hagmann P. 2009. Predicting human resting-state functional  
628 connectivity from structural connectivity. *Proc Natl Acad Sci U S A.*  
629 106(6):2035-2040.

- 630 Hutchison RM, Hutchison M, Manning KY, Menon RS, Everling S. 2014.  
631 Isoflurane induces dose-dependent alterations in the cortical  
632 connectivity profiles and dynamic properties of the brain's functional  
633 architecture. *Hum Brain Mapp.* 35(12):5754-5775.
- 634 Hutchison RM, Womelsdorf T, Allen EA, Bandettini PA, Calhoun VD,  
635 Corbetta M, Della Penna S, Duyn JH, Glover GH, Gonzalez-Castillo J  
636 et al. 2013. Dynamic functional connectivity: Promise, issues, and  
637 interpretations. *Neuroimage.* 80:360-378.
- 638 Ji D, Wilson MA. 2007. Coordinated memory replay in the visual cortex and  
639 hippocampus during sleep. *Nat Neurosci.* 10(1):100-107.
- 640 Karahanoğlu FI, Van De Ville D. 2015. Transient brain activity disentangles  
641 fmri resting-state dynamics in terms of spatially and temporally  
642 overlapping networks. *Nat Commun.* 6:7751.
- 643 Laumann TO, Snyder AZ, Mitra A, Gordon EM, Gratton C, Adeyemo B,  
644 Gilmore AW, Nelson SM, Berg JJ, Greene DJ et al. 2016. On the  
645 stability of bold fmri correlations. *Cereb Cortex.*
- 646 Liu X, Chang C, Duyn JH. 2013. Decomposition of spontaneous brain  
647 activity into distinct fmri co-activation patterns. *Front Syst Neurosci.*  
648 7:101.
- 649 Liu X, Duyn JH. 2013. Time-varying functional network information  
650 extracted from brief instances of spontaneous brain activity. *Proc Natl*  
651 *Acad Sci U S A.* 110(11):4392-4397.
- 652 Liégeois R, Laumann TO, Snyder AZ, Zhou J, Yeo BTT. 2017. Interpreting  
653 temporal fluctuations in resting-state functional connectivity mri.  
654 *Neuroimage.* 163:437-455.
- 655 Logothetis NK, Eschenko O, Murayama Y, Augath M, Steudel T, Evrard HC,  
656 Besserve M, Oeltermann A. 2012. Hippocampal-cortical interaction  
657 during periods of subcortical silence. *Nature.* 491(7425):547-553.
- 658 Lu H, Zuo Y, Gu H, Waltz JA, Zhan W, Scholl CA, Rea W, Yang Y, Stein EA.  
659 2007. Synchronized delta oscillations correlate with the resting-state  
660 functional mri signal. *Proc Natl Acad Sci U S A.* 104(46):18265-18269.
- 661 Ma Y, Shaik MA, Kim SH, Kozberg MG, Thibodeaux DN, Zhao HT, Yu H,  
662 Hillman EM. 2016. Wide-field optical mapping of neural activity and



- 663 brain haemodynamics: Considerations and novel approaches. *Philos*  
664 *Trans R Soc Lond B Biol Sci.* 371(1705).
- 665 Majeed W, Magnuson M, Keilholz SD. 2009. Spatiotemporal dynamics of low  
666 frequency fluctuations in bold fmri of the rat. *J Magn Reson Imaging.*  
667 30(2):384-393.
- 668 Matsui T, Koyano KW, Tamura K, Osada T, Adachi Y, Miyamoto K, Chikazoe  
669 J, Kamigaki T, Miyashita Y. 2012. Fmri activity in the macaque  
670 cerebellum evoked by intracortical microstimulation of the primary  
671 somatosensory cortex: Evidence for polysynaptic propagation. *PLoS*  
672 *One.* 7(10):e47515.
- 673 Matsui T, Murakami T, Ohki K. 2016. Transient neuronal coactivations  
674 embedded in globally propagating waves underlie resting-state  
675 functional connectivity. *Proc Natl Acad Sci U S A.* 113(23):6556-6561.
- 676 Matsui T, Tamura K, Koyano KW, Takeuchi D, Adachi Y, Osada T, Miyashita  
677 Y. 2011. Direct comparison of spontaneous functional connectivity and  
678 effective connectivity measured by intracortical microstimulation: An  
679 fmri study in macaque monkeys. *Cereb Cortex.* 21(10):2348-2356.
- 680 Messé A, Rudrauf D, Benali H, Marrelec G. 2014. Relating structure and  
681 function in the human brain: Relative contributions of anatomy,  
682 stationary dynamics, and non-stationarities. *PLoS Comput Biol.*  
683 10(3):e1003530.
- 684 Mohajerani MH, Chan AW, Mohsenvand M, LeDue J, Liu R, McVea DA,  
685 Boyd JD, Wang YT, Reimers M, Murphy TH. 2013. Spontaneous  
686 cortical activity alternates between motifs defined by regional axonal  
687 projections. *Nat Neurosci.* 16(10):1426-1435.
- 688 Murakami T, Matsui T, Ohki K. 2017. Functional segregation and  
689 development of mouse higher visual areas. *J Neurosci.*  
690 37(39):9424-9437.
- 691 Murakami T, Yoshida T, Matsui T, Ohki K. 2015. Wide-field ca(2+) imaging  
692 reveals visually evoked activity in the retrosplenial area. *Front Mol*  
693 *Neurosci.* 8:20.
- 694 Pan WJ, Thompson G, Magnuson M, Majeed W, Jaeger D, Keilholz S. 2011.  
695 Broadband local field potentials correlate with spontaneous

- 696           fluctuations in functional magnetic resonance imaging signals in the  
697           rat somatosensory cortex under isoflurane anesthesia. *Brain Connect.*  
698           1(2):119-131.
- 699 Pannunzi M, Hindriks R, Bettinardi RG, Wenger E, Lisofsky N, Martensson  
700           J, Butler O, Filevich E, Becker M, Lochstet M et al. 2017.  
701           Resting-state fmri correlations: From link-wise unreliability to whole  
702           brain stability. *Neuroimage.* 157:250-262.
- 703 Power JD, Barnes KA, Snyder AZ, Schlaggar BL, Petersen SE. 2012.  
704           Spurious but systematic correlations in functional connectivity mri  
705           networks arise from subject motion. *Neuroimage.* 59(3):2142-2154.
- 706 Power JD, Mitra A, Laumann TO, Snyder AZ, Schlaggar BL, Petersen SE.  
707           2014. Methods to detect, characterize, and remove motion artifact in  
708           resting state fmri. *Neuroimage.* 84:320-341.
- 709 Preti MG, Bolton TA, Van De Ville D. 2016. The dynamic functional  
710           connectome: State-of-the-art and perspectives. *Neuroimage.*
- 711 Shmueli K, van Gelderen P, de Zwart JA, Horovitz SG, Fukunaga M, Jansma  
712           JM, Duyn JH. 2007. Low-frequency fluctuations in the cardiac rate as  
713           a source of variance in the resting-state fmri bold signal. *Neuroimage.*  
714           38(2):306-320.
- 715 Tagliazucchi E, Balenzuela P, Fraiman D, Chialvo DR. 2012a. Criticality in  
716           large-scale brain fmri dynamics unveiled by a novel point process  
717           analysis. *Front Physiol.* 3:15.
- 718 Tagliazucchi E, Balenzuela P, Fraiman D, Montoya P, Chialvo DR. 2011.  
719           Spontaneous bold event triggered averages for estimating functional  
720           connectivity at resting state. *Neurosci Lett.* 488(2):158-163.
- 721 Tagliazucchi E, Laufs H. 2014. Decoding wakefulness levels from typical  
722           fmri resting-state data reveals reliable drifts between wakefulness  
723           and sleep. *Neuron.* 82(3):695-708.
- 724 Tagliazucchi E, von Wegner F, Morzelewski A, Brodbeck V, Laufs H. 2012b.  
725           Dynamic bold functional connectivity in humans and its  
726           electrophysiological correlates. *Front Hum Neurosci.* 6:339.
- 727 Thompson GJ, Merritt MD, Pan WJ, Magnuson ME, Grooms JK, Jaeger D,  
728           Keilholz SD. 2013. Neural correlates of time-varying functional

- 729 connectivity in the rat. *Neuroimage*. 83:826-836.
- 730 Tohmi M, Meguro R, Tsukano H, Hishida R, Shibuki K. 2014. The  
731 extrageniculate visual pathway generates distinct response properties  
732 in the higher visual areas of mice. *Curr Biol*. 24(6):587-597.
- 733 Van Dijk KR, Hedden T, Venkataraman A, Evans KC, Lazar SW, Buckner RL.  
734 2010. Intrinsic functional connectivity as a tool for human  
735 connectomics: Theory, properties, and optimization. *J Neurophysiol*.  
736 103(1):297-321.
- 737 Vanni MP, Murphy TH. 2014. Mesoscale transcranial spontaneous activity  
738 mapping in *gcamp3* transgenic mice reveals extensive reciprocal  
739 connections between areas of somatomotor cortex. *J Neurosci*.  
740 34(48):15931-15946.
- 741 Vincent JL, Patel GH, Fox MD, Snyder AZ, Baker JT, Van Essen DC, Zempel  
742 JM, Snyder LH, Corbetta M, Raichle ME. 2007. Intrinsic functional  
743 architecture in the anaesthetized monkey brain. *Nature*.  
744 447(7140):83-86.
- 745 Wekselblatt JB, Flister ED, Piscopo DM, Niell CM. 2016. Large-scale  
746 imaging of cortical dynamics during sensory perception and behavior.  
747 *J Neurophysiol*. 115(6):2852-2866.
- 748 White BR, Bauer AQ, Snyder AZ, Schlaggar BL, Lee JM, Culver JP. 2011.  
749 Imaging of functional connectivity in the mouse brain. *PLoS One*.  
750 6(1):e16322.
- 751 Zalesky A, Fornito A, Cocchi L, Gollo LL, Breakspear M. 2014. Time-resolved  
752 resting-state brain networks. *Proc Natl Acad Sci U S A*.  
753 111(28):10341-10346.
- 754 Zariwala HA, Borghuis BG, Hoogland TM, Madisen L, Tian L, De Zeeuw CI,  
755 Zeng H, Looger LL, Svoboda K, Chen TW. 2012. A cre-dependent  
756 *gcamp3* reporter mouse for neuronal imaging in vivo. *J Neurosci*.  
757 32(9):3131-3141.
- 758
- 759

760 **Figure Captions**

761 **Figure 1. Representative dynamics of simultaneously observed calcium and**  
762 **hemodynamic FC. (A)** Experimental setup. The left most panel shows the setup for  
763 simultaneous imaging. Right side shows example calcium time courses for two ROIs  
764 (green and cyan traces indicate M1 and V1 ROIs, respectively. Positions of the ROIs  
765 indicated in the example field of view. See Supplementary Figure 1 for abbreviations).  
766 FC with short time window uses subset of frames contained in short (30 sec) windows  
767 (red dotted squares). Sliding FC for hemodynamic signal was carried out similarly.  
768 **(B)-(C)** Examples dynamics of calcium and hemodynamic FC. (B) FC between right V1  
769 and right AC. (C) FC between left M1 and left pPar. See Supplementary Figure 1 for  
770 ROI positions and abbreviations. **(D)** Histogram of correlation between time courses of  
771 Ca-FC and Hemo-FC for the data (solid line) and the scan-shifted control (dotted line).  
772 Data from all pairs of ROIs for all scans obtained in all mice were used.

773

774 **Figure 2. Significant relationship between calcium and hemodynamic FC**  
775 **calculated in short time windows. (A)-(B)** Example ROI-by-ROI FC matrices for  
776 calcium and hemodynamics for different (non-overlapping) 30 sec windows. FC  
777 matrices were similar for calcium and hemodynamics in the same time window, but not  
778 across different time windows. (A) and (B) are two different examples from different  
779 animals. **(C)** Cumulative histogram of correlation between FC matrices for calcium and  
780 hemodynamics. Dotted line indicates trial-shifted control. **(D)** Correlation between FC  
781 matrices for calcium and hemodynamics was larger for the data than for the trial-shifted  
782 control significantly across animals. **(E)** Correlation between FC matrices of calcium  
783 and hemodynamics was larger for the data than the trial-shifted control across different  
784 window-sizes (1, 2, 3, 5, 6, 10, 12, 15, 20, 30 and 60 sec). Error bars indicate s.e.m.  
785 across animals (n = 7).

786

787 **Figure 3. Comparison of calcium CAPs and hemodynamic FC across**  
788 **time-windows. (A)** Procedure for detection of CAPs in calcium signal. For a given ROI,  
789 a calcium time course was extracted and z normalized (green time courses). Then, peaks  
790 exceeding 2 s.d. (red dots) were extracted. The frames corresponding to the peaks were  
791 considered CAPs (panels above the time courses). For each window, CAPs in calcium  
792 signal were averaged to obtain mean calcium CAP. Hemodynamic CAPs were

793 calculated similarly (see Methods). Maps of Ca-FC and Hemo-FC were also calculated  
794 using the same time window. **(B)** Schematics to show the procedure of comparing  
795 calcium CAP and Hemo-FC across all ROI pairs in each time window. In each 30 sec  
796 time window, mean calcium CAPs and Hemo-FC maps were calculated for all ROIs as  
797 seeds (left). Then, for each seed-ROI  $j$ , calcium CAP and Hemo-FC values in ROI  $i$   
798 were extracted to obtain a pair of CAP-FC values for the ROI-pairs  $(i, j)$  (middle).  
799 Finally, for each time-window, CAP-FC values were compared across all pairs of ROIs  
800 (right). **(C)** Histograms of correlation between CAP and Hemo-FC for all time windows  
801 across all animals. Vertical line indicates mean across time windows. **(D)** Mean  
802 correlation between CAP and Hemo-FC across animals. Note that (C) shows entire  
803 distribution of the data whereas (D) shows reproducibility across mice. Error bar  
804 indicates s.e.m. across animals ( $n = 7$ ).

805

806 **Figure 4. Temporal fluctuations in calcium CAPs and Hemo-FC was significantly**  
807 **related.** **(A)** Schematics of the analysis. In each 30 sec time-window, mean calcium  
808 CAP and Hemo-FC were calculated (indicated as window CAP and window FC,  
809 respectively). From window CAP and window FC, average calcium CAP and average  
810 Hemo-FC that were calculated using the entire scan, in which the 30-sec window  
811 belongs to, were subtracted to obtain maps of  $\Delta$ CAP and  $\Delta$ FC, respectively. Finally,  
812 values of  $\Delta$ CAP and  $\Delta$ FC were compared across ROI pairs similarly as in Figure 3B.  
813 **(B)** Histograms of correlation between  $\Delta$ CAP and  $\Delta$ FC for all time windows across all  
814 animals. Vertical lines indicate mean across time windows. Solid and dotted lines  
815 indicate real and trial-shifted data, respectively. **(C)** Correlation between  $\Delta$ CAP and  
816  $\Delta$ FC was significantly larger for the data than for trial-shifted control across animals.  
817 **(D)** Same as (C) but with different window-sizes (1, 2, 3, 5, 6, 10, 12, 15, 20, 30 and 60  
818 sec). Error bars indicate s.e.m. across animals ( $n = 7$ ).

819

820 **Figure 5. Comparison with simulated data indicated non-stationarity of the real**  
821 **data.** **(A)** Examples of real and simulated time courses. Simulated time course (black)  
822 was matched to real data (green; calcium) in mean spectral content (middle panels) and  
823 ROI-by-ROI covariance matrix (right panels). The same procedure was applied to  
824 create simulated hemodynamic data (not shown). **(B)** Cluster validity index calculated  
825 for different number of clusters ( $k = 2-10$ ). In both calcium (left) and hemodynamics

826 (right), the cluster validity index was smaller for the real (solid lines) than the simulated  
827 data (dotted lines) indicating that the real data tended to be more clustered. (C) Kurtosis  
828 of real and simulated covariance matrices. For both calcium (left) and hemodynamics  
829 (right), multivariate kurtosis was larger for the real than for the simulated data. Error  
830 bars indicate s.e.m. across animals ( $n = 7$ ).

831

832 **Supplementary Figure 1. Anatomical locations of ROIs.** Anatomical locations of 19  
833 ROIs are shown for the right hemisphere. Anatomical nomenclatures of ROIs are shown  
834 on the right. ROIs in the left hemisphere are taken at mirror symmetric positions to  
835 yield a total of 38 ROIs.

836

837 **Supplementary Figure 2. Power spectrum of calcium and hemodynamic signals.**  
838 (A) Example power spectrum of hemodynamic signal for one mouse. Hemodynamic  
839 signals were not temporally filtered. Black, individual scan. Red, average across scans.  
840 (B) Average power spectrum of hemodynamic signal across mice (Red). Black,  
841 individual mouse (averaged across scans). (C) Example power spectrum of calcium  
842 signal for one mouse. Calcium signals were not temporally filtered. Black, individual  
843 scan. Red, average across scans. (D) Average power spectrum of calcium signal across  
844 mice (red). Black, individual mouse (average across scans).

845

846 **Supplementary Figure 3. Example time courses and histograms of DVARS**  
847 **calculated using hemodynamic signal.** (A) Example time course of DVARS for one  
848 mouse. (B) Histogram of DVARS for the data shown in (A). Inset, same histogram but  
849 for different y-axis range. The histogram was not markedly right skewed (skewness =  
850 1.60). (C) Another example time course of DVARS obtained in the same mouse as in  
851 (A). In this scan, large peaks probably representing motion and/or physiological  
852 artifacts were observed. (D) Histogram of DVARS calculated using data shown in (C).  
853 Inset, same histogram but for different y-axis range. The histogram was strongly  
854 right-skewed (skewness = 6.54).

855

856 **Supplementary Figure 4. Difference between the kurtosis of real and simulated**  
857 **data in Hemodynamics.** Kurtosis was calculated for scans selected based on the  
858 distribution of DVARS ( $n = 25$ ). See Methods for details of the selection of the scans. \*,

859  $P < 0.0001$  (sign rank test). Error bars indicate s.e.m.

860

861 **Supplementary Figure 5. Difference between the kurtosis of real and simulated**  
862 **data in hemodynamics as a function of DVARS threshold for frame-censoring.** The  
863 difference of the kurtosis between the real and the simulated data (blue and red,  
864 respectively) was largely insensitive to the level of the DVARS threshold. Note that the  
865 smaller DVARS threshold indicates stricter threshold. Error bars indicate s.e.m.

866

867 **Supplementary Figure 6. Kurtosis analysis using calcium signal processed with**  
868 **additional high-pass and media filters. (A)** Example histogram of high frequency  
869 calcium signal ( $> 0.1$  Hz) in one ROI of one mouse before the application of median  
870 filter. Red, Gaussian fit. **(B)** Same as (A) but for the signal after the application of  
871 median filter. Red, Gaussian fit. Note better fitting with Gaussian after median filter  
872 application, suggesting enforced normality of the signal.

873

874 **Supplementary Figure 7. Kurtosis analysis using low frequency calcium signal. (A)**  
875 Example histogram of low frequency calcium signal ( $0.01 \text{ Hz} < f < 0.1 \text{ Hz}$ ) in one ROI  
876 of one mouse. Red, Gaussian fit. **(B)** Difference between the kurtosis of real and  
877 simulated data in low frequency calcium signal for scans selected based on the  
878 normality of the signal (55 scans). \*,  $P < 10^{-9}$ , sign rank test. Error bars indicate s.e.m.

879

880 **Supplementary Figure 8. Hemodynamic signal was approximately normally**  
881 **distributed. (A)** Example histogram of hemodynamic signal in one ROI of one mouse.  
882 Red, Gaussian fit. Note that no additional preprocessing was performed. **(B)** Difference  
883 between the kurtosis of real and simulated data in hemodynamic signal for scans  
884 selected based on the normality of the signal (45 scans). \*,  $P < 10^{-8}$ , sign rank test. Error  
885 bars indicate s.e.m.

886

887 **Supplementary Figure 9. Significant temporal correlation between CAP and**  
888 **windowed-FC remained after removing scans with potential artifacts. (A)** Same  
889 convention as in Figure 4B but for the data using scans selected for small movement  
890 and/or physiological artifacts based on DVARS (25 scans). \*,  $P < 10^{-17}$ ,  
891 Kolmogorov-Smirnov test. **(B)** Same convention as in Figure 4C but for the selected

892 scans. Positive difference between the real and the shifted data was observed in 5 out of

893 7 mice.

894

895



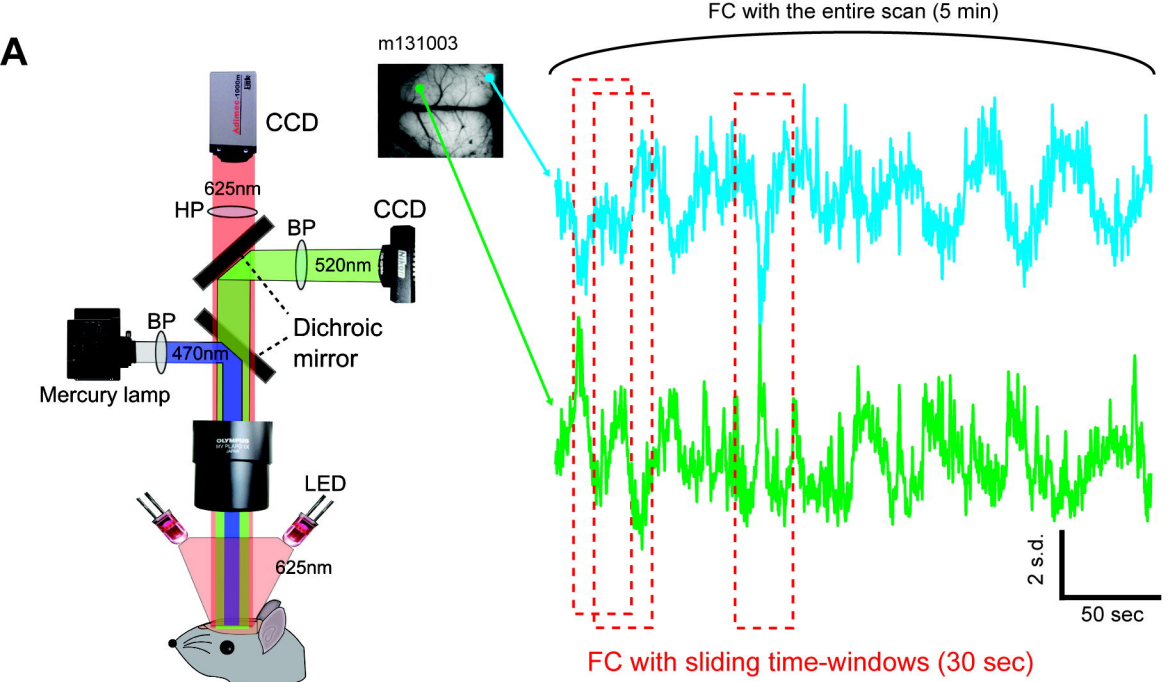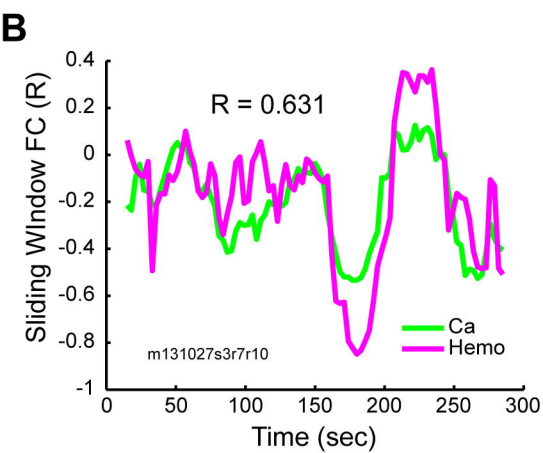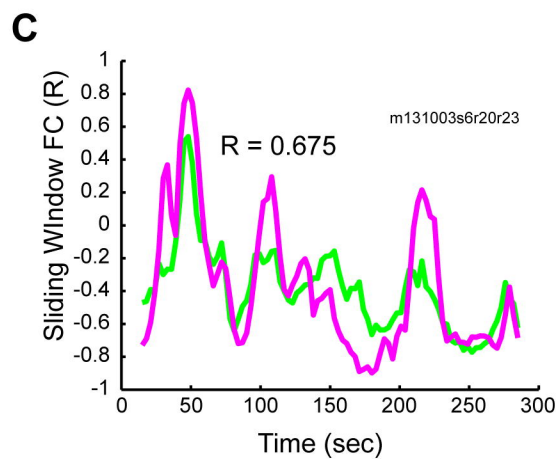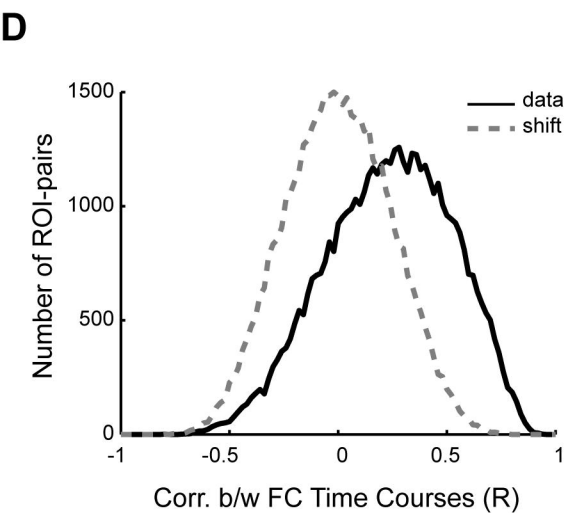

**Figure 1**

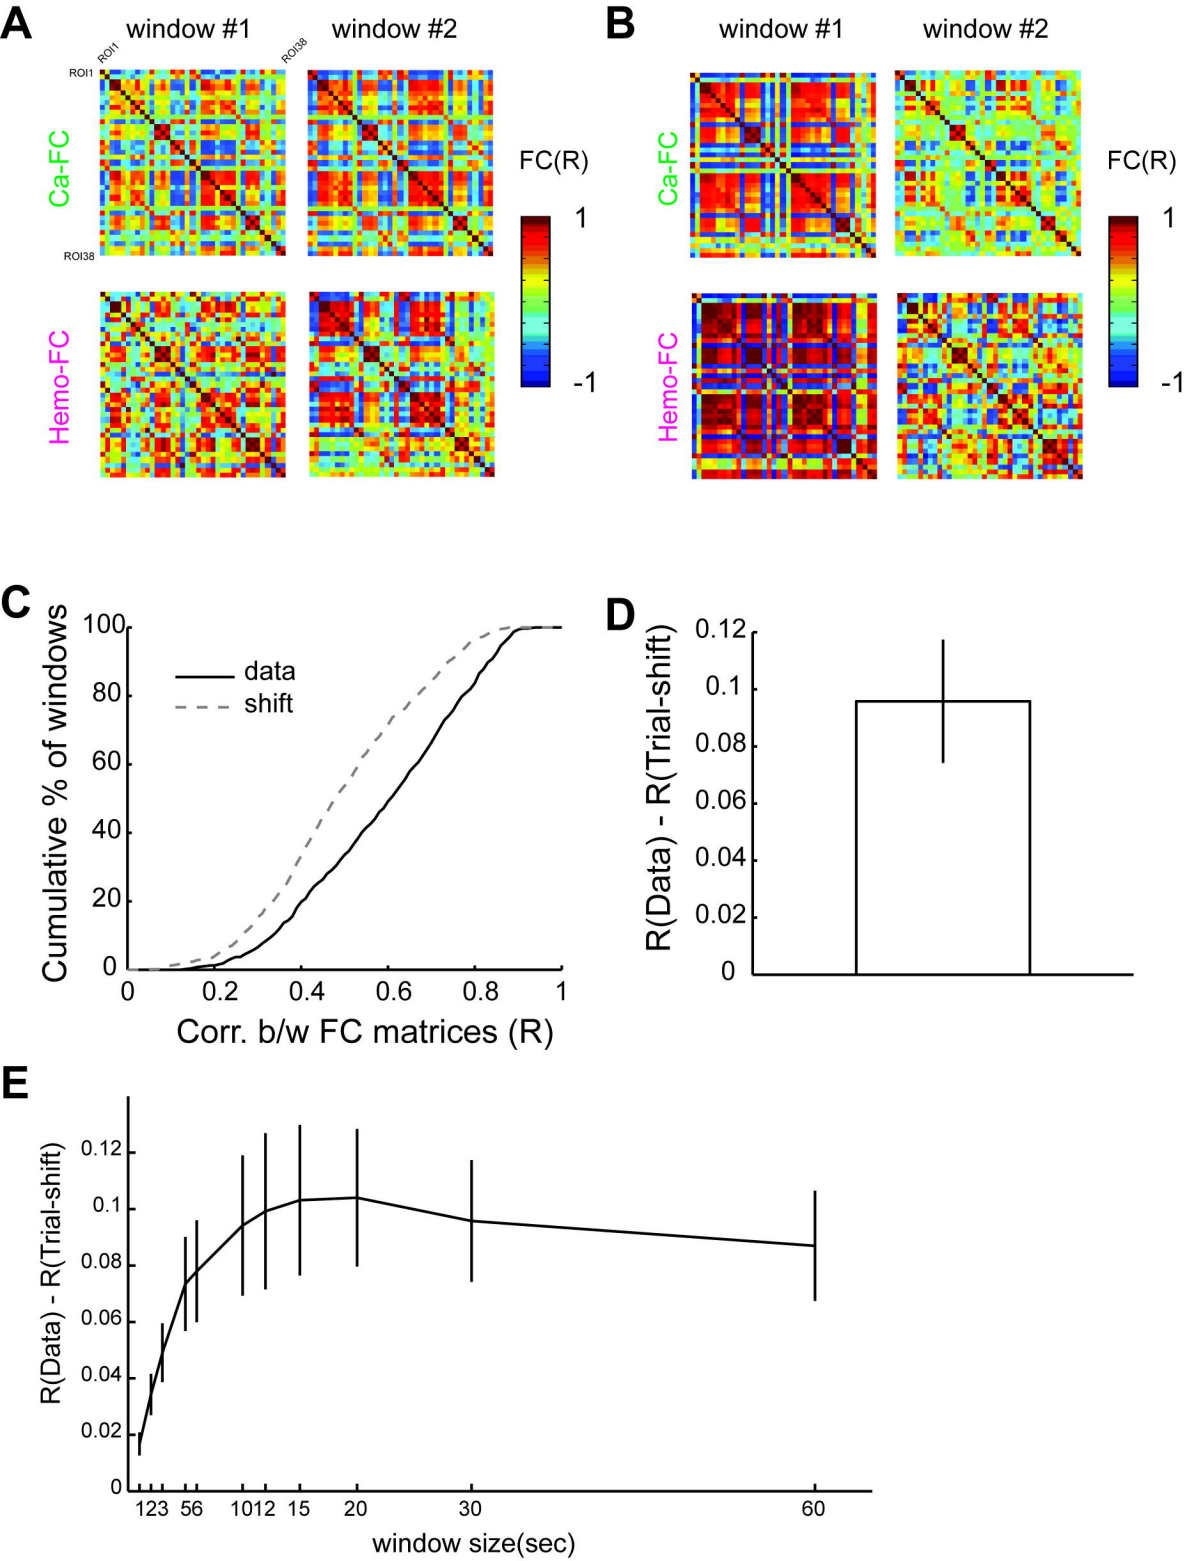

**Figure 2**

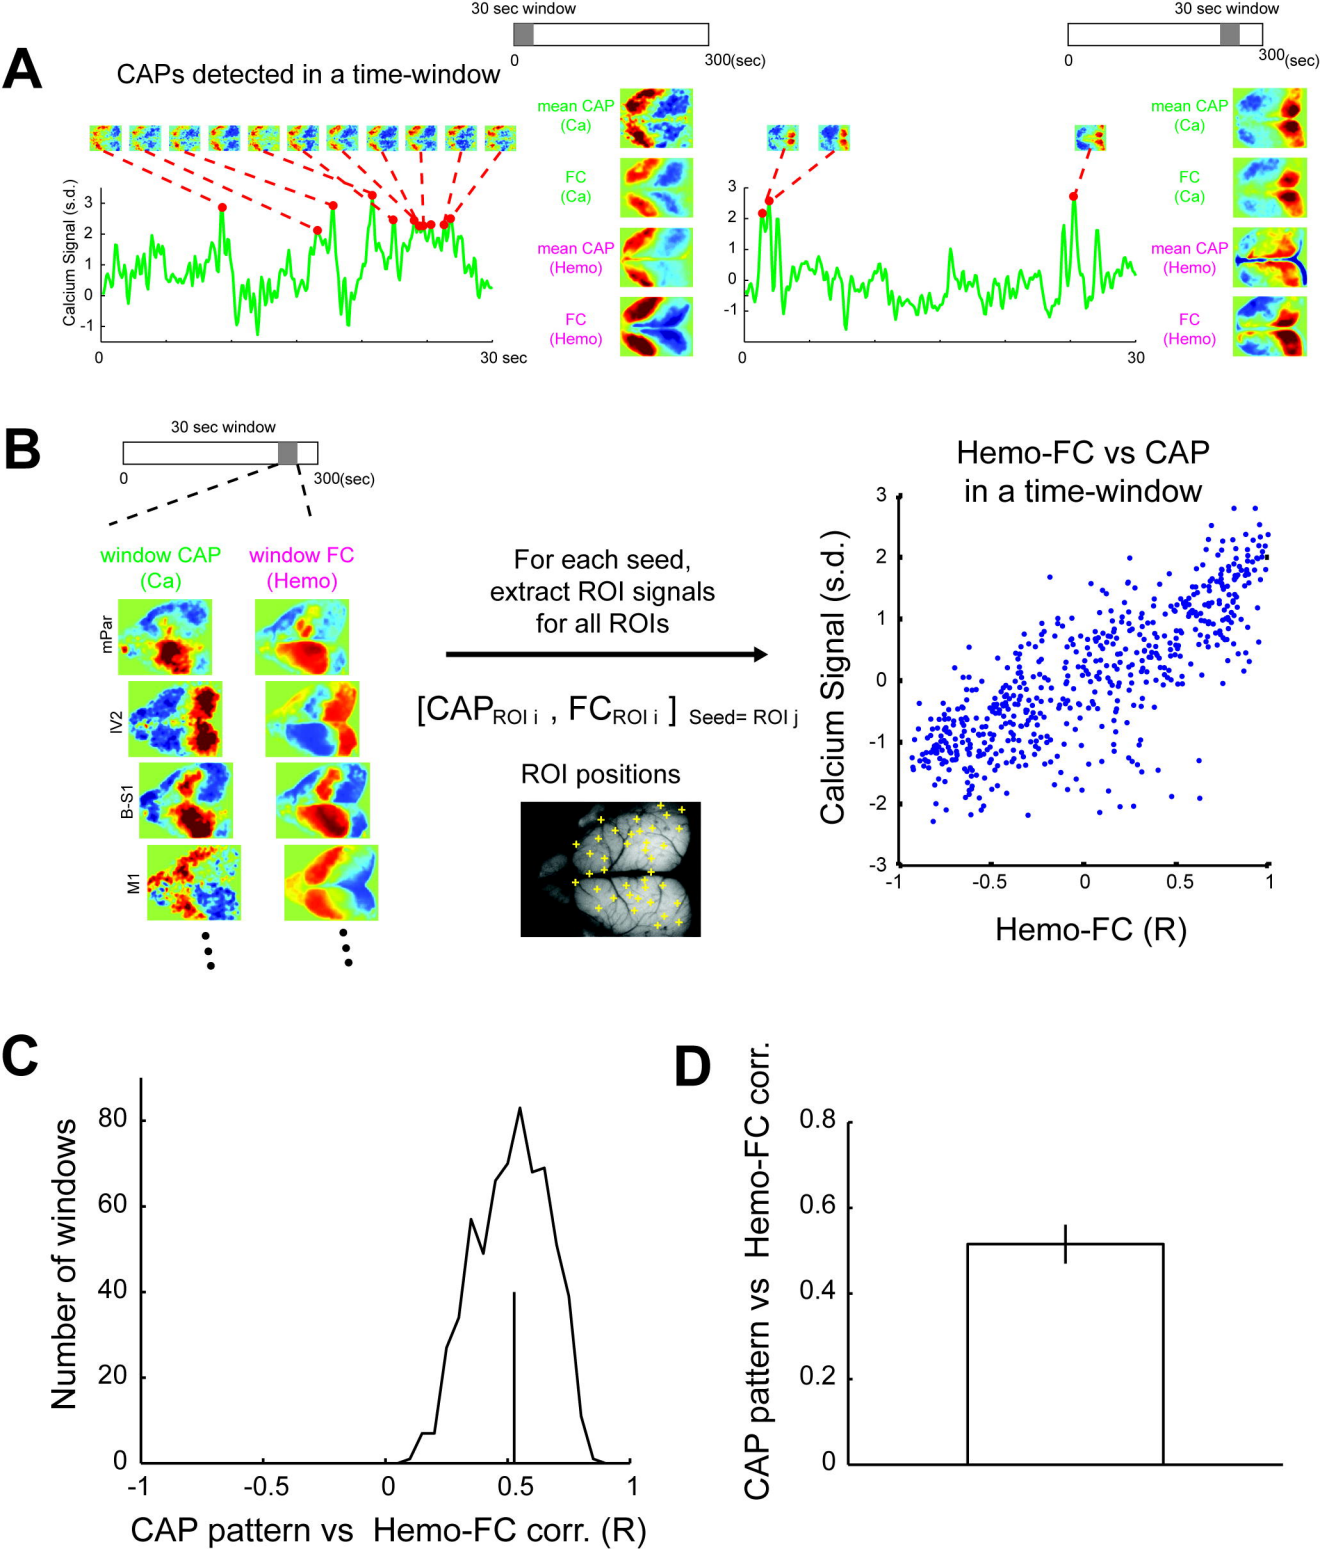

**Figure 3**

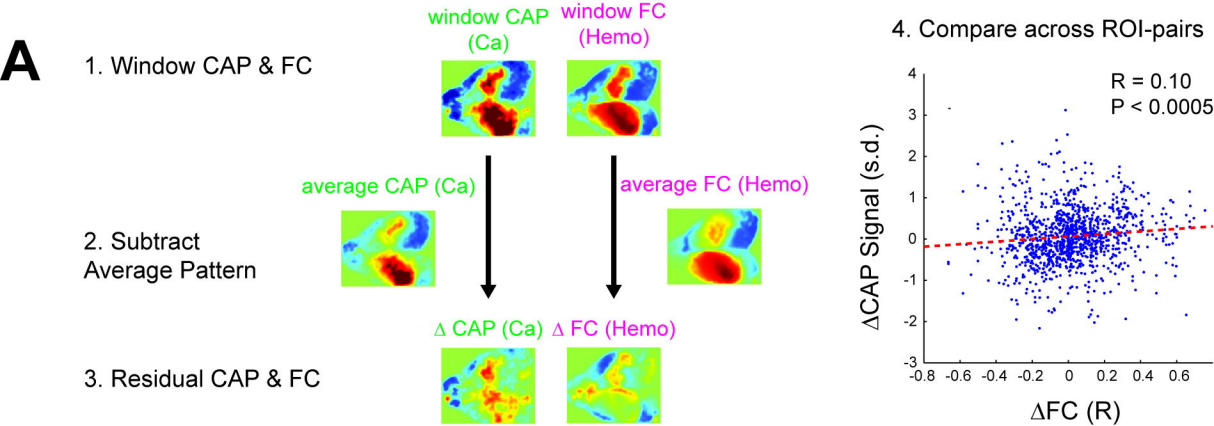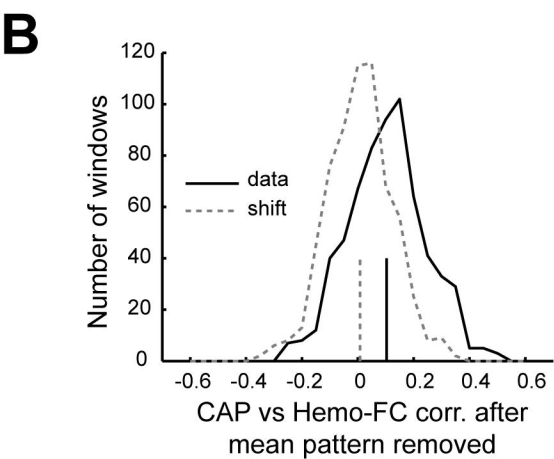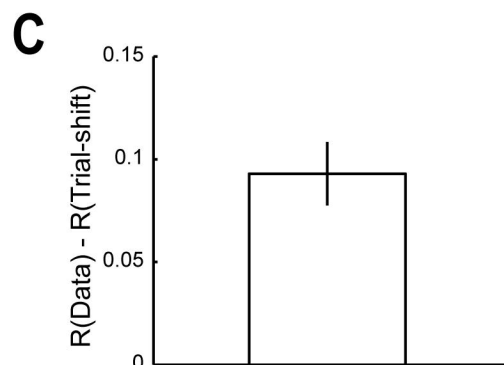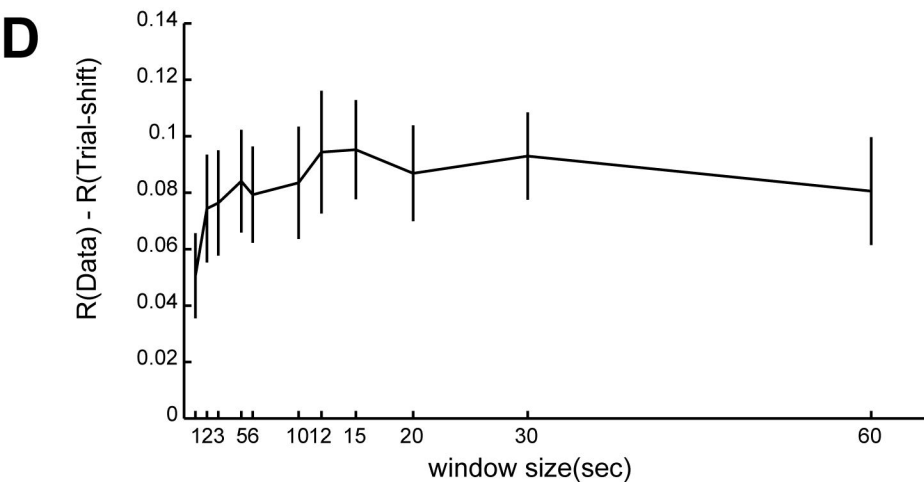

**Figure 4**

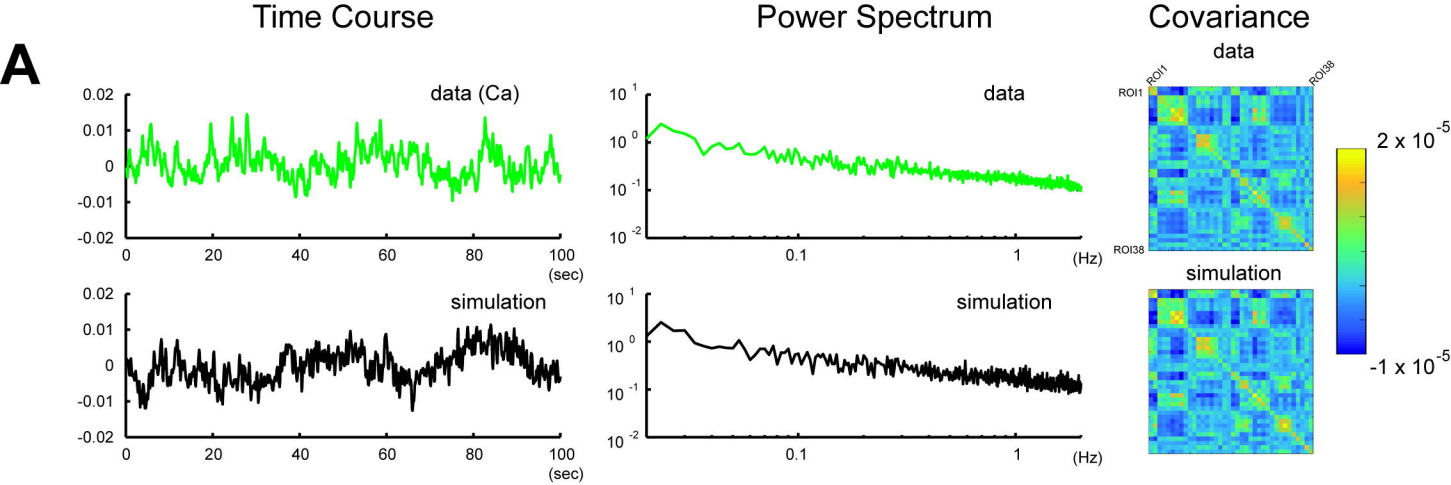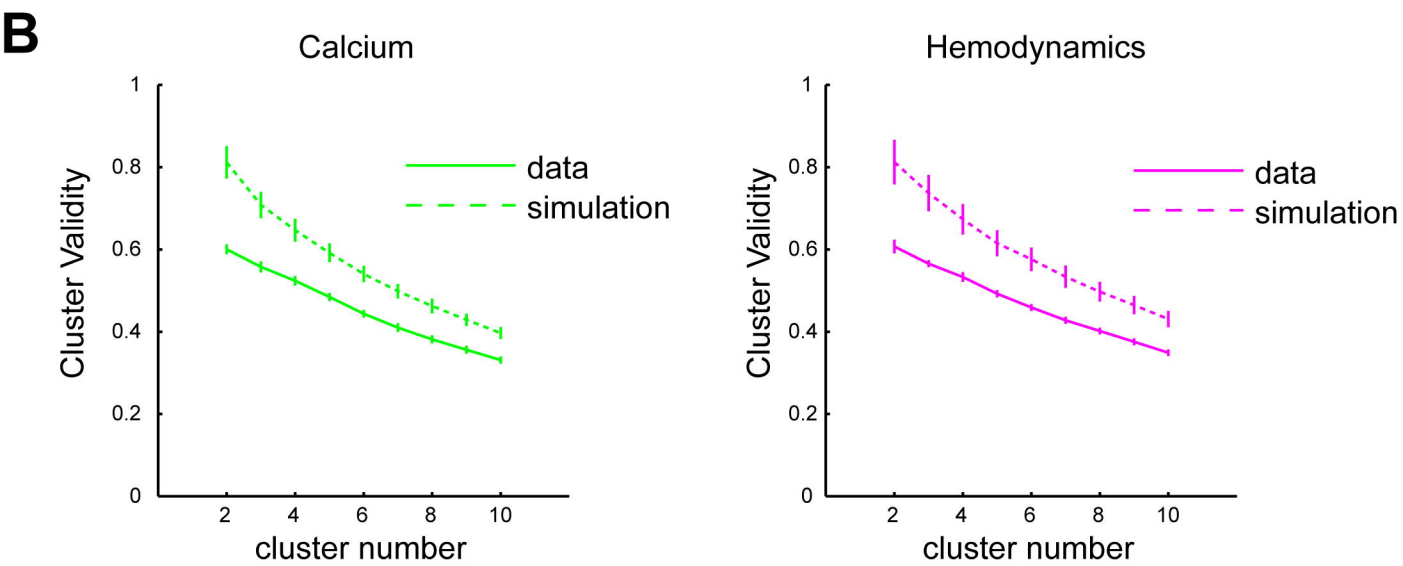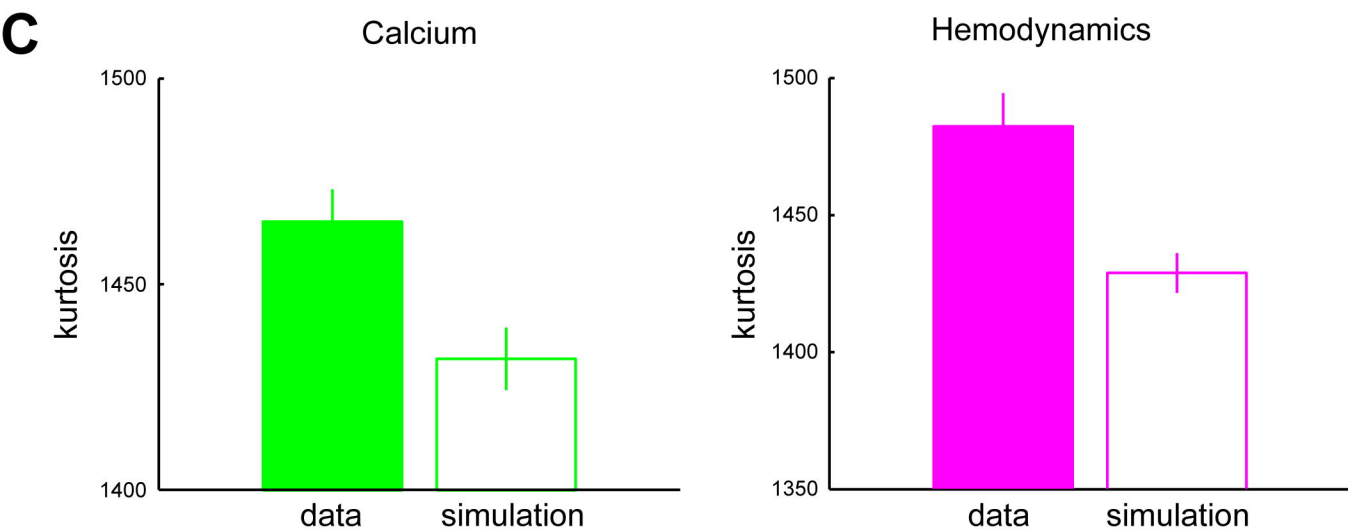

**Figure 5**

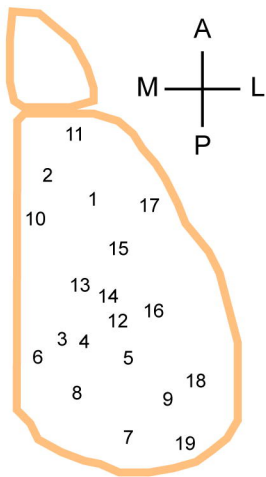

1. Primary Motor Area (M1)
2. Secondary Motor Area (M2)
3. Parietal Medial Area (mPar)
4. Parietal Lateral Area (lPar)
5. Parietal Posterior Area (pPar)
6. Restrosplenial Area (Rsp)
7. Primary Visual Area (V1)
8. Medial Secondary Visual Area (mV2)
9. Lateral Secondary Visual Area (lV2)
10. Anterior Cingulate Area (AC)
11. Frontal Association Area (FAsc)
12. Trunk Region of Primary Somatosensory Area (Tr-S1)
13. Hindlimb Region of Primary Somatosensory Area (HL-S1)
14. Shoulder Region of Primary Somatosensory Area (Sh-S1)
15. Forelimb Region of Primary Somatosensory Area (FL-S1)
16. Barrel Region of Primary Somatosensory Area (B-S1)
17. Head Region of Primary Somatosensory Area (H-S1)
18. Auditory Area (Aud)
19. Temporal Association Area (TA)

# Supplementary Figure 1



Example Mouse

All Mice

**A**

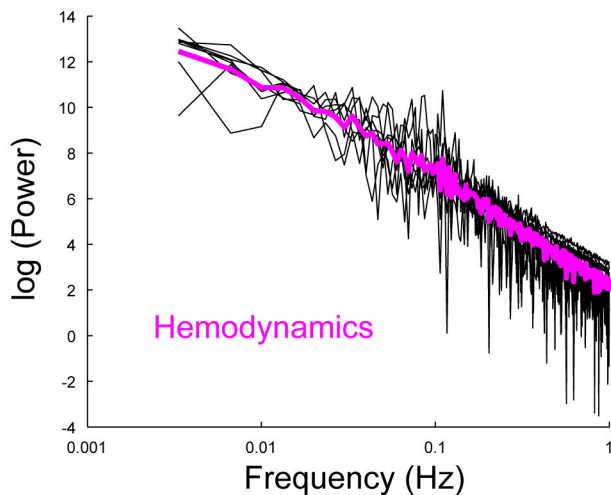

**B**

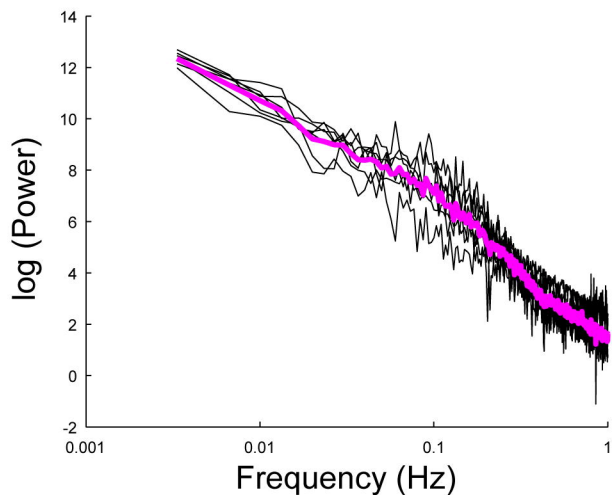

**C**

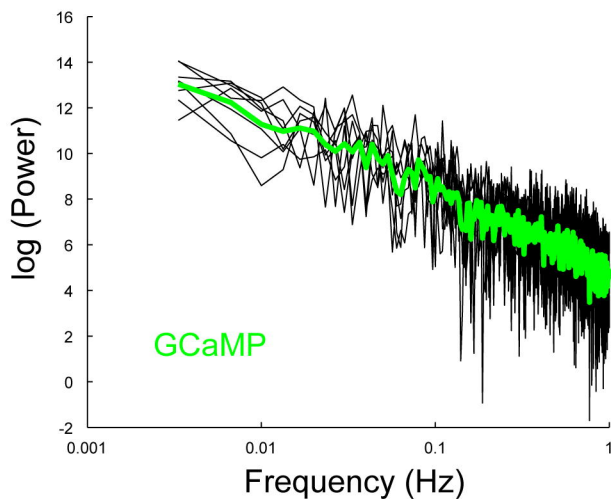

**D**

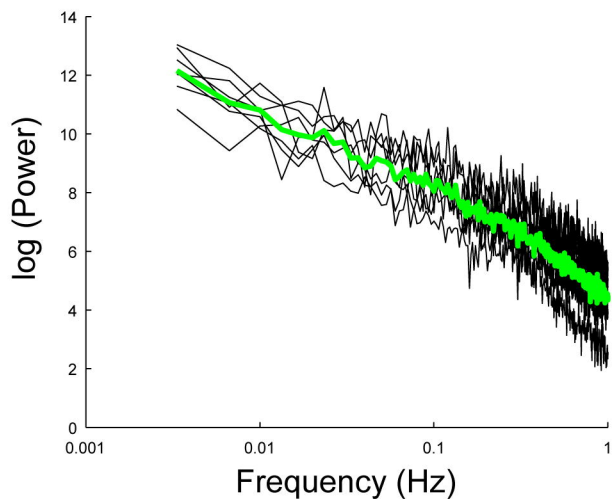

**Supplementary Figure 2**

**A**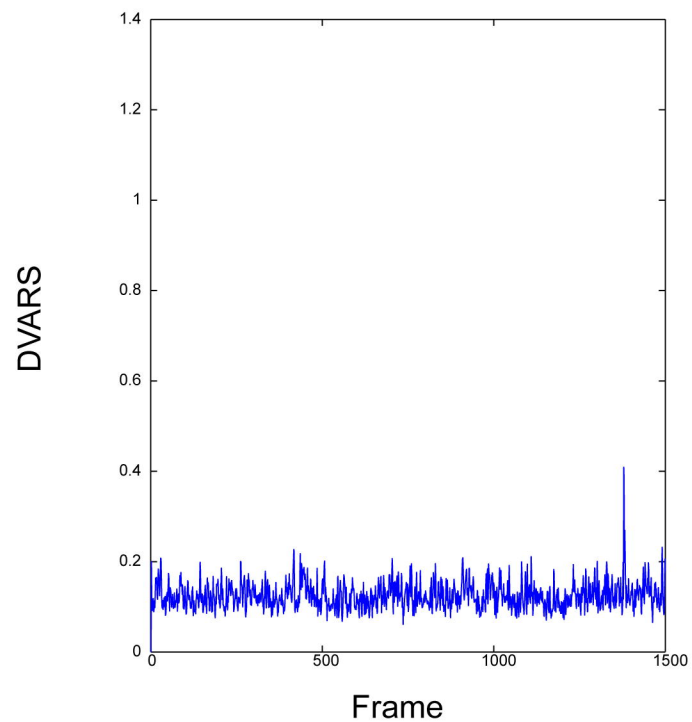**B**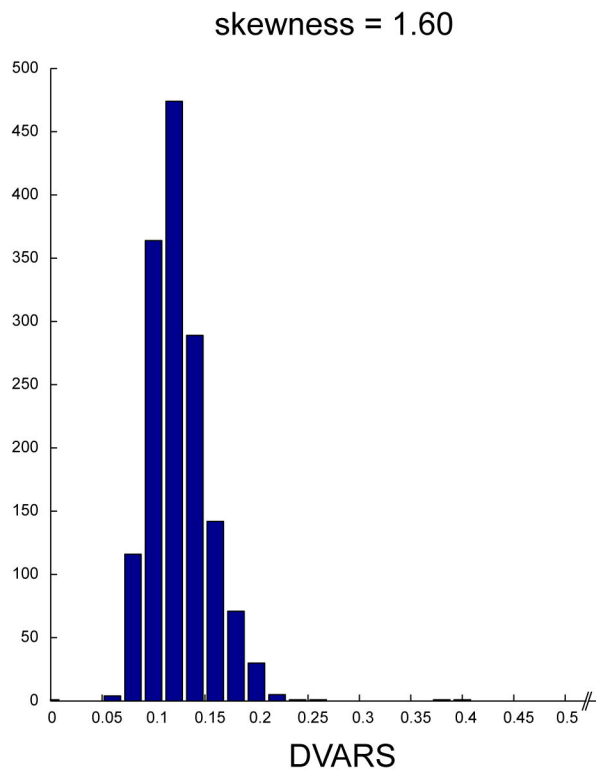**C**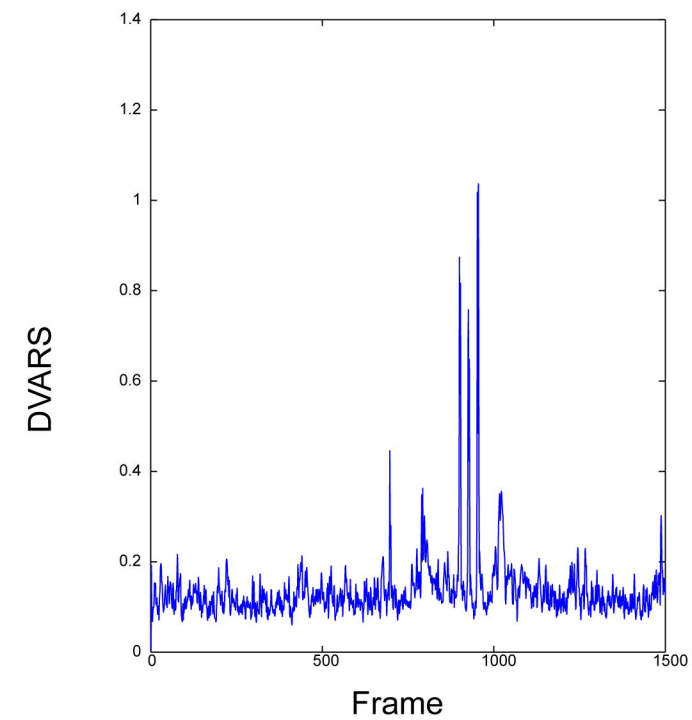**D**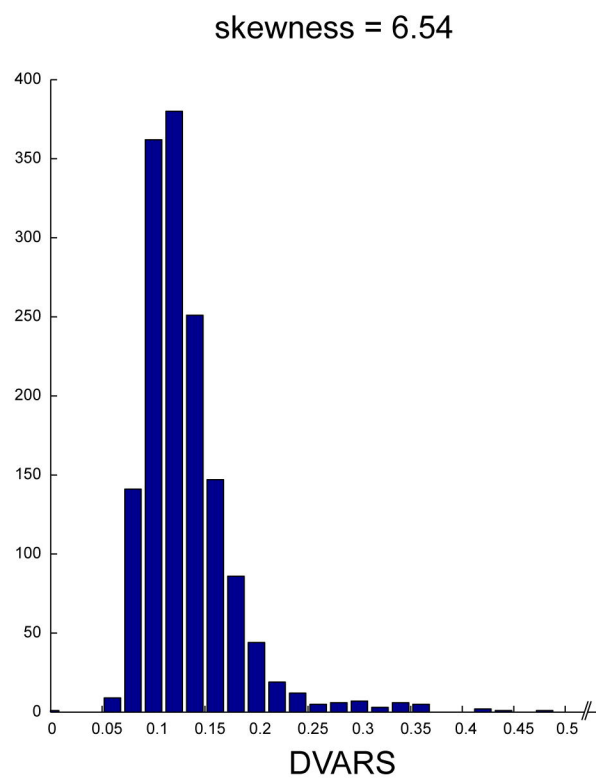

# Supplementary Figure 3



# Hemodynamics

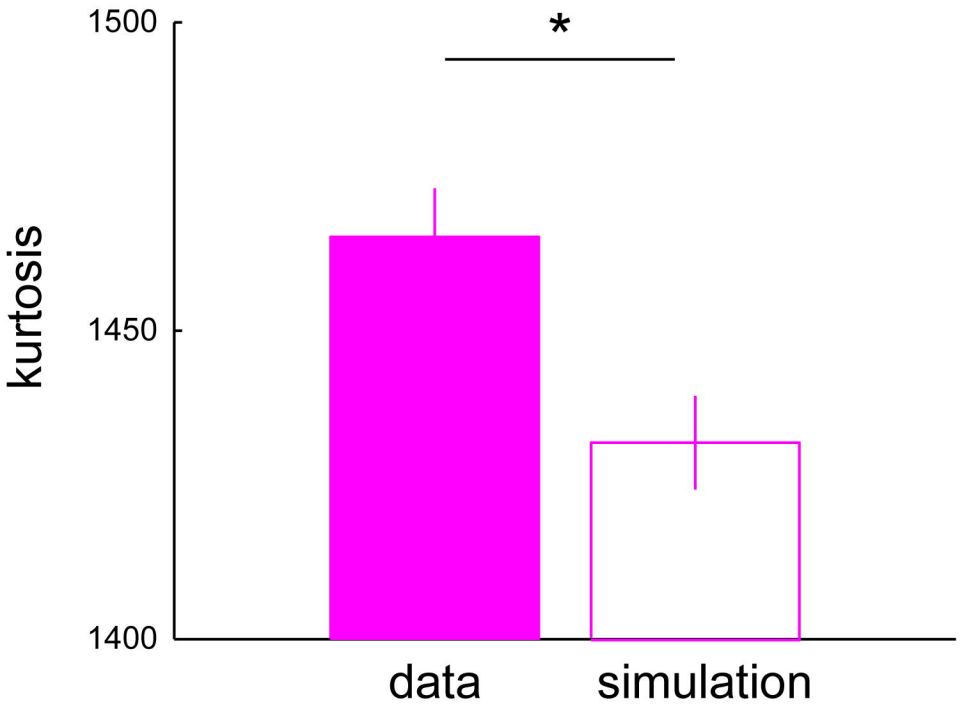

**Supplementary Figure 4**

# Hemodynamics

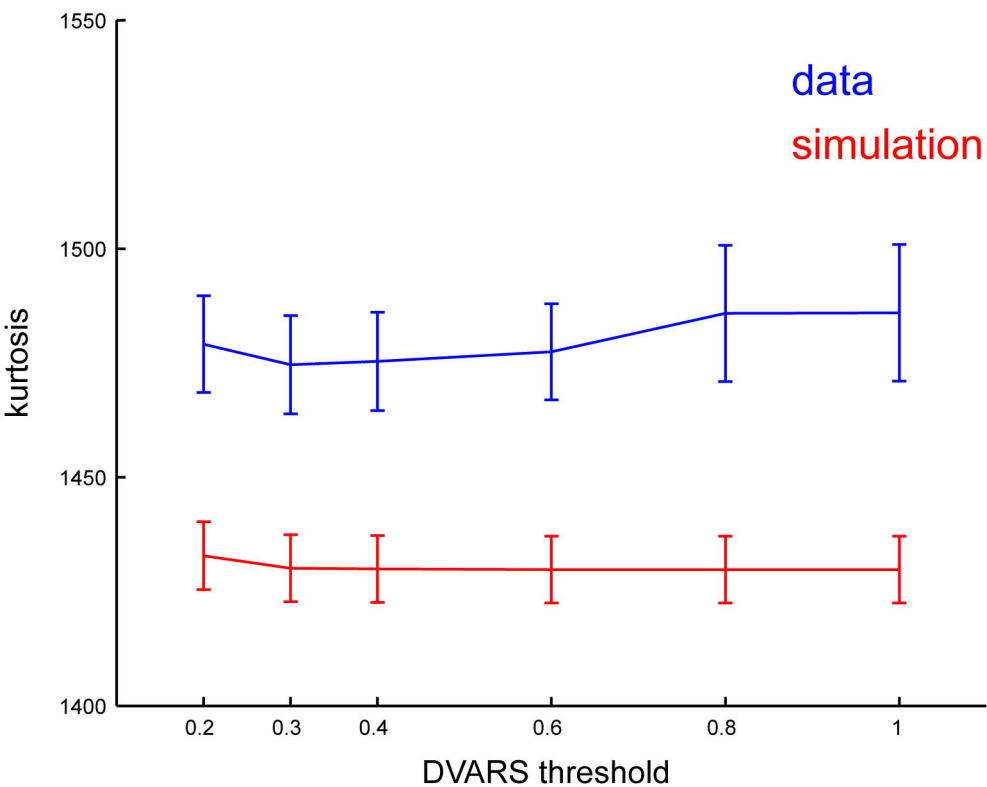

# Supplementary Figure 5

**A**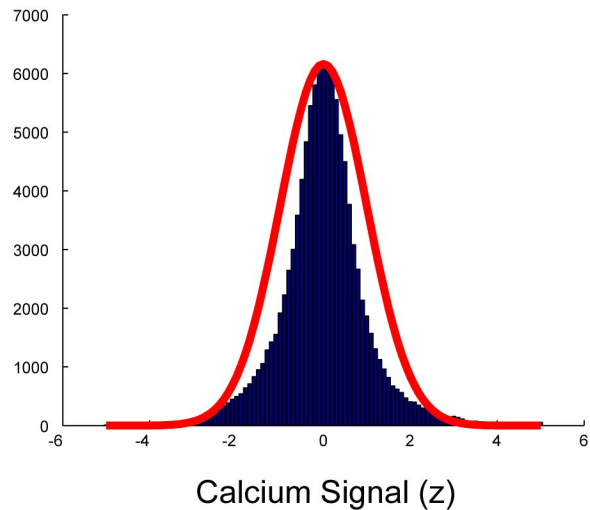**B**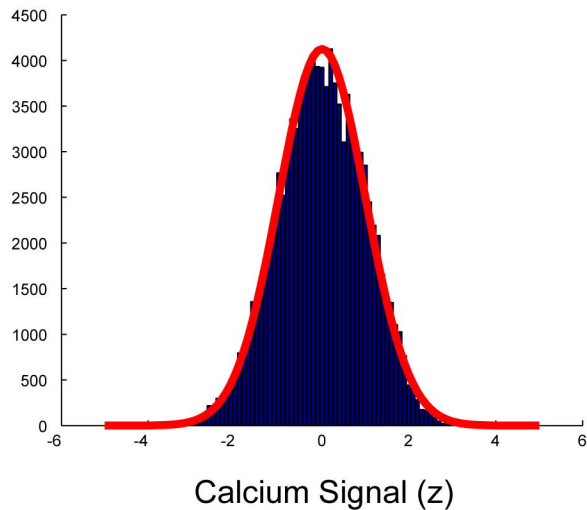

# Supplementary Figure 6

**A**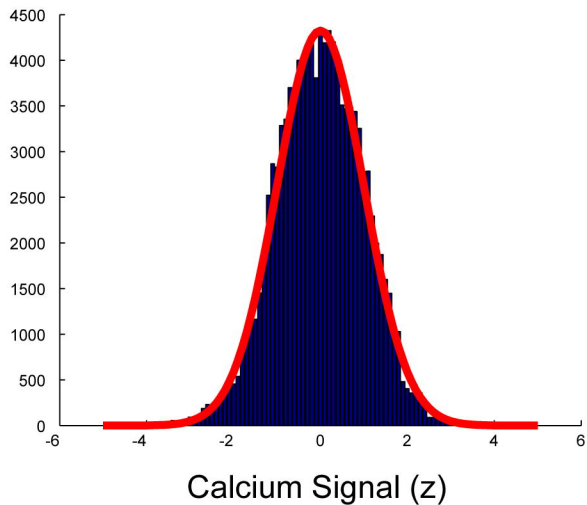**B**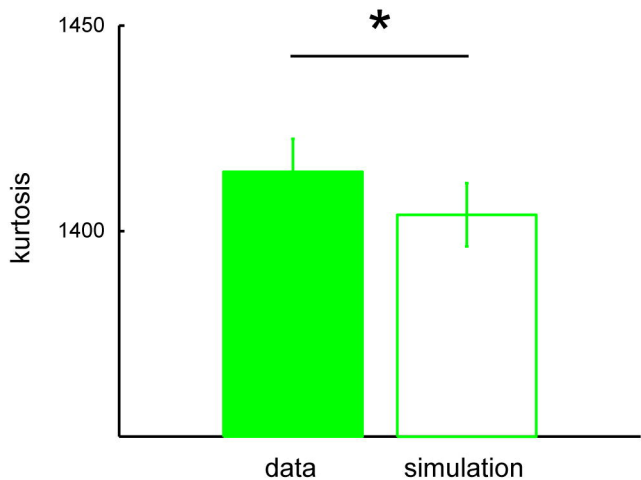

# Supplementary Figure 7

**A**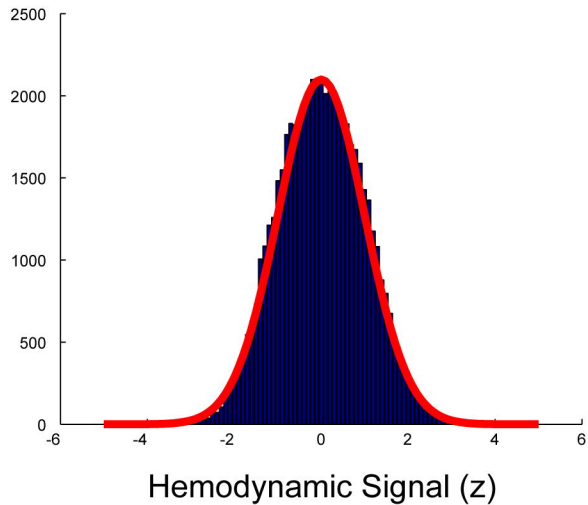**B**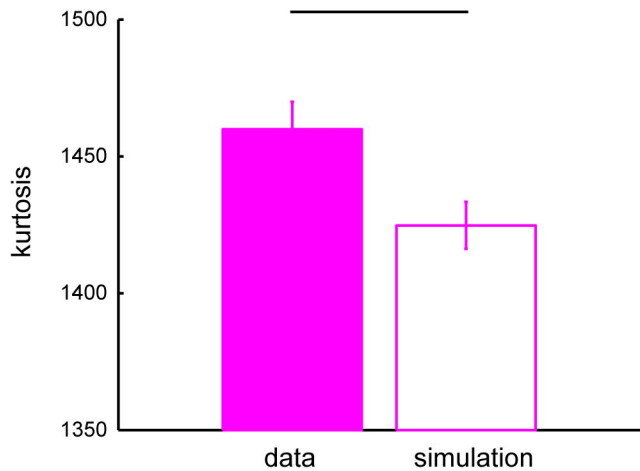

# Supplementary Figure 8

**A**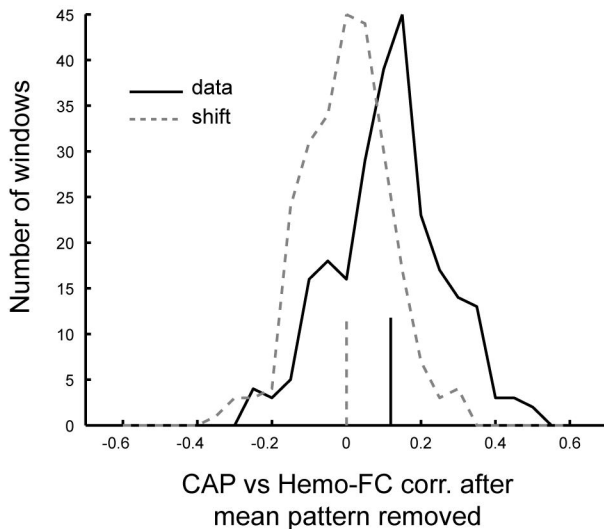**B**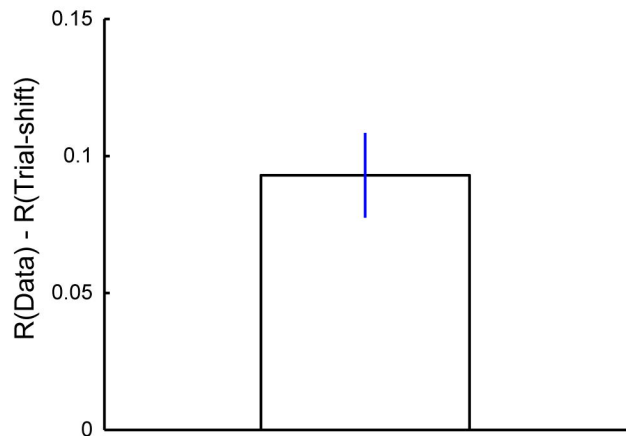

# Supplementary Figure 9
